# Endometrial Gap Junction Expression - Early Indicators of Endometriosis and Integral to Invasiveness

Chen-Wei Chen <sup>#,1</sup>, Jeffery Chavez <sup>#,1</sup>, Li-Ling Lin<sup>2</sup>, Chiou-Miin Wang<sup>2</sup>, Ya-Ting Hsu<sup>2</sup>, Matthew J. Hart<sup>1</sup>, Jianhua Ruan<sup>3</sup>, Laurel Gillette <sup>4</sup>, Richard O. Burney<sup>4</sup>, Robert S. Schenken<sup>5</sup>, Randal D. Robinson<sup>5</sup>, Maria Gaczynska<sup>2</sup>, Pawel Osmulski<sup>2</sup>, Nameer B. Kirma<sup>2\*</sup>, Bruce J. Nicholson<sup>1\*</sup>

<sup>1</sup> Department of Biochemistry and Structural Biology, UT Health San Antonio, Texas, USA

<sup>2</sup> Department of Molecular Medicine, UT Health San Antonio, Texas, USA

<sup>3</sup> Department of Computer Science, UTSA, San Antonio, Texas, USA

<sup>4</sup> Madigan Army Medical Center, Tacoma, WA.

<sup>5</sup> Department of Obstetrics and Gynecology, UT Health San Antonio, Texas, USA

# Equal contributions as first authors

\*Co-corresponding authors

kirma@uthscsa.edu (NBK)

nicholsonb@uthscsa.edu (BJN)

**Abbreviated Title:** Gap junctions and invasiveness in endometriosis

## Abstract

1 Endometriosis is an invasive disease, and a leading cause of pain, infertility and disability among  
2 women, with an incidence 10 fold that of cancer. A more complete understanding of disease  
3 pathogenesis is essential for the development of non-surgical diagnostic assays and non-  
4 hormonal therapeutics. Avoidance of immune clearance and implantation of endometrial tissue  
5 on peritoneal surfaces are features of endometriosis lesion formation that overlap with cancer  
6 metastasis. Connexins, and the gap junctions they form, have been implicated in cancer  
7 progression, and may be associated endometriosis pathophysiology. Single cell transcriptomic  
8 profiling of endometrial epithelial and stromal cells from women with endometriosis reveals a  
9 striking and progressive shift in expression of connexins and related regulatory and junctional  
10 genes. We demonstrate that gap junction coupling between endometrial cells and the peritoneal  
11 mesothelium is dramatically induced, specifically in endometriosis patients, and is required for  
12 invasion by inducing breakdown of the mesothelial barrier function.

## 13 INTRODUCTION

14 Endometriosis is a chronic inflammatory disease affecting 6-10% of reproductive age  
15 women (Eskenazi and Warner,1997). Characterized by the presence of endometrial tissue in  
16 extrauterine locations including the pelvic peritoneum, ovary and bowel surface, endometriosis is  
17 diagnosed in 35-50% of women with pelvic pain and up to 50% of women with unexplained  
18 infertility (Rogers et.al., 2009). At an estimated annual cost of \$12,000 per patient in terms of  
19 diagnosis and treatment, and adding in the significant loss of productivity, endometriosis care  
20 entails significant socioeconomic burden for both individual patients and healthcare systems  
21 estimated to cost \$80 billion per year for the US alone (Soliman et.al., 2016). In the absence of a  
22 biomarker, laparoscopic surgery remains the gold standard for diagnosis. The requirement for  
23 invasive surgery, which fails to confirm endometriosis almost half the time (Mettler et.al., 2003)  
24 contributes to an average latency of 6.7 years from onset of symptoms to definitive diagnosis  
25 (Bontempo and Mikesell, 2020), and results in 68% of women suffering from endometriosis being  
26 incorrectly diagnosed (Hudelist et.al., 2012). Diagnostic delay allows time for disease progression,  
27 and potentially worsens sequelae and prognosis. An improved understanding disease etiology is  
28 critical to developing new diagnostics and therapies.

29 The original, and still most widely accepted, model for the pathogenesis of endometriosis  
30 is retrograde menstruation, in which sloughed endometrial tissue during menses traverses the  
31 fallopian tubes and forms invasive lesions within the peritoneal cavity (Sampson, 1927).  
32 Peritoneal origins have also been proposed (Mismar et.al., 2004; Sasson and Taylor, 2008), but  
33 the preponderance of evidence still favors endometrial origins (reviewed in Burney and Giudice,  
34 2012). Abundant evidence supports molecular differences in the eutopic endometrium of women  
35 with and without endometriosis [Burney et.al., 2007; Rogers et. al., 2009; Ulukus et. al., 2006; Yu  
36 et.al.,2014] suggesting enhanced survival (Jones et.al., 1998) and invasive potential (Lucidi et.al.,  
37 2005) of endometrium from affected women. These innate or acquired molecular features  
38 distinguish women with endometriosis, and may predispose endometrial tissue to invade and form  
39 lesions when transported into the pelvic cavity and distinguish women destined to develop  
40 endometriosis [Hastings and Fazleabas, 2006, Tamaresis et.al., 2014]. Since retrograde  
41 menstruation is estimated to occur in 76-90% of women, but only 6-10% develop endometriosis  
42 (Burney and Giudice, 2012) the interaction of displaced endometrium and the peritoneum is a key  
43 differentiating step in disease pathogenesis. Peritoneal factors also influence disease  
44 progression, including the hormonal environment (Parente Barbosa et.al., 2011), oxidative stress  
45 and inflammation (Augoulea et.al., 2012) or decreased immune clearance (Oosterlynck et.al.,  
46 1991), although this could be due to changes in the endometrial cells themselves (Somigliana  
47 et.al., 1996). This has fueled the debate over whether endometriosis originates from changes in  
48 the uterus that predispose the cells to lesion formation (the “seed” model) or if it is more a property  
49 of a receptive peritoneal environment (the “soil” hypothesis).

50 To understand the molecular underpinnings of endometrial-peritoneal interaction in lesion  
51 formation, we have focused on a class of proteins that has been implicated in tissue invasion,  
52 infertility and inflammation in other contexts, but incompletely explored in the pathophysiology of  
53 endometriosis. Gap junctions, composed of connexin (Cx) proteins encoded by a family of 21 GJ  
54 (A-D) genes, mediate direct contact and communication between most cells of the body via  
55 exchange of ions as well as metabolites and signaling molecules <1kD (Goldberg et.al, 1999;  
56 Weber et.al, 2004). Gap junctions have been shown to be essential to many invasive processes,  
57 both normal (e.g. blastocyst implantation – Grummer et.al., 1996) and pathogenic (e.g.  
58 metastasis). Increased Cx43 and Cx26 expression and gap junction intercellular communication  
59 (GJIC) have been associated with metastasis and poor prognosis in breast (Kanczuga-Koda  
60 et.al., 2006; Naoi et.al. 2007; Stoletov et.al., 2013) and prostate cancers (Zhang et.al., 2014;  
61 Lamiche et.al., 2012), and elevated Cx26 with melanoma metastases (Ito et.al., 2000). Connexins

62 exert their effects both during intravasation and extravasation (as cells enter and leave the  
63 circulation) [el Sabban and Pauli, 1991, 1994; Ito et.al, 2000, Naoi et.al, 2007], as well as  
64 establishment of distant lesions by forming heterotypic GJIC (Lamiche et.al., 2012; Stoletov, et.al.,  
65 2013; Hong et.al, 2015; Chen et.al., 2016). In a global screen of cervical squamous carcinoma,  
66 Cx43 emerged as one of three genes (along with PDGFRA2 and CAV-1) central to cancer  
67 invasion and metastasis (Cheng et.al., 2015).

68 Gap junctions are also critical for a number of steps in human fertility (reviewed in  
69 Winterhager and Kidder, 2015). Endometrial gap junctions, comprised of Cx43, are essential for  
70 decidualization [Kaushik et.al., 2020], blastocyst implantation [Grummer et.al.,1996: Diao et.al.,  
71 2013] and vascularization and endometrial development during pregnancy [Laws et.al., 2008].  
72 Connexins have also been linked to induction of inflammatory processes that either inhibit tissue  
73 repair (Willebrords et.al., 2016), such as wound healing of the skin (Montgomery et.al., 2018) and  
74 cornea (Ormonde et.al., 2012) processes thought to be driven by ATP release through connexin  
75 hemichannels (Mugisho et.al., 2018).

76 With regard to endometriosis, prior immunohistochemistry studies demonstrated a shift in  
77 Cx expression of endometrial epithelial cells (EECs) from primarily Cx26, with some Cx32 (*GJB1*),  
78 in the uterus to Cx43 in peritoneal (ectopic) endometriotic lesions (Regidor et.al., 1997). By  
79 contrast, endometrial stromal cells (ESCs) show predominantly Cx43 expression in both eutopic  
80 and ectopic locations, although at reduced levels in endometriosis patients (Yu et.al., 2014). This  
81 modified expression profile of connexins seen in ectopic lesions of women with endometriosis  
82 was recapitulated in eutopic endometrial tissue in an endometriosis model in baboons  
83 (Winterhager et.al., 2009), suggesting that early changes in the endometrium might predispose  
84 refluxed menstrual endometrial tissue within the pelvic cavity for invasiveness (Guo et.al., 2004;  
85 Lucidi et.al., 2005; ).

86 Our objective in this study was to characterize the contribution of Cxs within the  
87 endometrial compartment to its invasive potential in the peritoneum, an essential process for  
88 endometriosis lesion formation. We have examined the connexin gene expression profiles in both  
89 endometrial stromal (ESC) and epithelial (EEC) cell compartments, using single cell analysis of  
90 tissue obtained by endometrial pipelle biopsy from women with and without endometriosis. . We  
91 also performed functional studies by assessing GJIC in both homotypic ESC and EEC cultures,  
92 as well as heterotypic co-cultures with peritoneal mesothelial cells (PMCs). We finally assessed  
93 the role of the primary gap junction (*GJ*) gene product, Cx43, in the trans-mesothelial invasive  
94 process by ESCs and EECs that is essential for endometriosis lesion formation. These studies  
95 provide unique insights into the endometrial-peritoneal interaction in lesion formation, and  
96 represent the first single cell transcriptomic analysis of connexins and gap junctions in  
97 endometriosis.  
98

## 99 RESULTS

### 100 **Expression profiles of Intercellular Interaction Genes in Endometrial Stromal and Epithelial** 101 **Cells from Women with and without Endometriosis**

102 While studies have addressed different aspects of endometriosis, from changes in hormonal  
103 responses and other contributors to infertility to inflammatory responses caused by peritoneal  
104 lesions, and some even on lesion formation, none have focused on what common themes may  
105 tie all these symptoms together. Given the links, described above, of connexins and gap junctions  
106 to each of these processes, we examined their expression patterns, and those of related genes  
107 involved in intercellular interactions and their regulation in the endometrial lining of normal and  
108 endometriosis patients by analysis of freshly isolated primary cells (i.e. P0). Specifically, the gene  
109 panel included: 13 of the total of 21 Cx genes, including the major expressers in the endometrium,

110 Cx43 (*GJA1*), 26 (*GJB2*) and 32 (*GJB1*), and at least one from each Cx class (*A*, *B* and *C*);  
111 adhesion proteins [N-cadherin (*CDH2*) and Ep-CAM], cytoplasmic proteins associated with  
112 junctional complexes [Drebin (*DBN1*),  $\beta$ -catenin (*CTNNB1*), caveolin (*CAV1*), *TJAP* and *ZO1* and  
113 *2* (*TJP1* and *2*)]; regulatory components of junctions, such as transcription factors [Snail 1  
114 (*SNAI1*)] and kinases (e.g. *PKA*, *PKC*, and *MAPK* isoforms, *CK1*, *SRC*, *CDK1*); components of  
115 the extracellular matrix (*MME*, *NOV*); housekeeping (*UBB*, *GAPDH*, *ACTIN*, and *GUSB*) and cell  
116 marker (Vimentin (*VIM*) and cytokeratin (*KRT18*)) genes. The genes, in the array, in order of  
117 presentation in the heat map, are provided in **Table S1**. Those shaded in grey were control genes  
118 for data normalization and are not presented in the arrays.

119 To optimally understand how changes in patterns of expression might contribute to  
120 disease etiology, we separated the two major endometrial cell types [epithelial or glandular  
121 (EECs) and stromal (ESCs)], the purity of which was demonstrated to be ~95% by  
122 immunocytochemistry (**Fig. S1**). To further maximize detection of micro-heterogeneities in  
123 expression patterns, we used the Fluidigm C1 single-cell capture system followed by the Biomark  
124 microfluidic PCR to examine expression at the single cell level within each population. Two normal  
125 subjects and 6 endometriosis patients (one in early stage (I-II), and the others later stage (III-IV)  
126 endometriosis) were examined, with samples taken from proliferative, early and late secretory  
127 menstrual phases, plus one non-cycling patient on birth control (**Table 1**). Normalized expression  
128 results for each cell type from each patient are displayed as a heat map, with each row  
129 representing a gene, and each column a cell (**Fig. 1A, B**). Distinct patterns of expression in  
130 stromal (ESCs) and epithelial cells (EECs) were evident, which in this patient sampling clearly  
131 distinguished normal from endometriosis samples, and even showed a gradual transition as  
132 disease progressed from early to late stages (**Fig. 1A, B**).

133 (a) **Gap Junction genes:** With respect to genes encoding connexins (*GJ* genes – located at  
134 the top of the maps), a subset of ESCs (~25% of total analyzed cell population) showed high  
135 relative expression of all *GJ* genes in normal subjects, which diminished somewhat in early stage  
136 (I/II) endometriosis samples, and drops to less than 10% in late stage (III/IV) endometriosis,  
137 regardless of the menstrual phase from which the sample is collected (**Fig. 1A**). Even though  
138 single EEC cell preparations could not be made from all patients, it was clear that the pattern was  
139 completely reversed compared to ESCs, with low expression of *GJ* genes in normal subjects (5%  
140 of cells show higher expression), which progressively increases in early (I/II) and late stage (III/IV)  
141 endometriosis where ~25% of cells show high expression (**Fig. 1B**). It is striking that this is true  
142 for all *GJ* genes, and not just the most abundantly expressed, like *GJA1*(Cx43). The combined  
143 expression levels of all *GJ* genes is illustrated in Violin plots for ESCs (**Fig. 1C**) and EECs (**Fig.**  
144 **1D**) from each patient, with similar plots for specific *GJ* genes shown in **Fig. S2** [top two rows of  
145 A (ESCs) and B (EECs)]. A Duncan analysis of the single-cell distributions shows that ESCs from  
146 all late stage endometriosis patients had significantly lower expression than ESCs from normal  
147 subjects and early stage endometriosis patients. The notable exceptions to this pattern in ESCs  
148 were those taken at the mid-secretory menstrual phase when progesterone levels, known to  
149 regulate connexin expression in the endometrium (Grummer et.al., 1994), are high [subjects 171  
150 (normal) and 169 (late endometriosis)]. EECs show the inverse pattern that was even detectable  
151 in early stage endometriosis (patient 164). In EECs, the pattern was not influenced by the stage  
152 of the menstrual cycle when samples were collected, although did seem to be affected in the one  
153 non-cycling patient on birth control (003).

154 Comparison of individual *GJ* gene expression (**Fig. S1**) showed that *GJA1* (Cx43) was  
155 expressed most highly in both ESCs and EECs, almost 10 fold that of other connexins. For ESCs,  
156 all *GJ* genes measured, except *GJC2*, showed decreases in late stage endometriosis compared  
157 to normal subjects and early stage patients (**Fig. S1A**). In EECs, most of the *GJ* genes show the  
158 inverse behavior seen in ESCs, increasing expression in endometriosis compared to that seen in

159 normal subjects. The exceptions were GJA1, the most highly expressed connexin, *GJA8*, *GJB7*  
160 and *GJC2* (**Fig. S1B**).

161 (b) **Other genes:** Several other genes involved in intercellular or cell-matrix interactions were  
162 also found to change in similar pattern to that of the GJ genes. The adhesion related genes  
163 *EpCAM*,  $\beta$ -catenin (*CTNNB1*), as well as *NOV1* show decreased expression in ESCs in  
164 endometriosis (**Fig. 1E**) but increase in EECs (**Fig. 1F**), while the master transcriptional regulator  
165 of epithelial to mesenchymal transitions (EMT), Snail 1 (*SNAIL1*), which negatively regulates  
166 several adhesion molecules (Hugo et.al., 2011) and Cx43 (deBoer et.al., 2007), shows the inverse  
167 pattern (increasing with endometriosis in ESCs and decreasing in EECs). Several other genes  
168 change in one or other cells type. In ESCs, the metallo-endopeptidase, *CD10* (**Fig. S2A**), *NOV1*  
169 and the catalytic subunit of protein kinase A gamma (*PRKACG*) decrease, and *ZO2* (*TJP2*), an  
170 accessory protein of tight and gap junctions, increases with disease (**Fig. 1E**). In EECs, only  
171 MAPK1 showed consistent increase in endometriosis patients (**Fig. 1F**). Some other genes  
172 showed increases in the two endometriosis patients in the proliferative or early secretory stages  
173 of their menstrual cycle [N-cadherin (*CDH2*), (**Fig. 1F**), and *PRKACG* (**Fig. S2B**)], but markedly  
174 different patterns in the non-cycling patient (**Fig. S2B**). Independent of these overall patterns, It  
175 is notable in the heat maps that the same subset of ESCs from the normal and early endometriosis  
176 samples (left three maps in **Fig. 1A**), and EECs from endometriosis patients (right two maps in  
177 **Fig. 1B**), that show high GJ genes expression, exhibit low expression of several of the tight  
178 junction associated genes, but higher expression of adhesion related genes (upper and lower  
179 rows, respectively in the group of genes labeled Adh/TJs) (**Fig. 1A and B**). Similar to what was  
180 observed for the tight junction associated genes, several of the regulatory genes (mostly kinases)  
181 we tested show the lowest expression in the cells that exhibit the highest expression of GJ genes  
182 (left three maps of ESCs (**Fig. 1A**) and right two maps if EECs (**Fig. 1B**)).

183

## 184 **Cell cluster analysis**

185 As an independent means to assess changes in gene expression in endometriosis, intra-  
186 sample cellular heterogeneity was analyzed by a graph-based cluster discovery algorithm (Ruan,  
187 2009). By design, the algorithm is able to identify topologically distinct clusters and, importantly,  
188 can automatically determine the most appropriate number of clusters for each dataset. Utilizing  
189 this algorithm, ESCs and EECs were divided into 6 and 5 sub-populations, respectively (**Fig. 2A**  
190 **and C**). This analysis confirmed the general impression from the Heat maps, that the cell sub-  
191 groups characterized by high GJ gene expression (sc-6 for ESCs, and ec-5 for EECs) consistently  
192 decreased as a percentage of the ESC population (**Fig. 2B**), but increased as a percentage of  
193 the EEC population (**Fig. 2D**) from normal through early stage to late stage endometriosis. This  
194 cell cluster most reliably tracked the progression of endometriosis. Stated differently, the  
195 abundance of cells showing combined GJ expression levels at the 80<sup>th</sup> percentile or above are  
196 highly predictive of disease state. For example, in ESCs all control subjects show >20%, early  
197 endometriosis 5-8% and late stage endometriosis <4%. This pattern was reversed in EECs,  
198 although we will need more patient samples to establish specific ranges.

199

## 200 **Functional assessment of GJIC in ESCs and EECs, with endometriosis progression**

201 We next assessed the functional consequences of these changes in GJ gene expression by  
202 measuring GJIC using an automated variant of the “parachute” technique where dye (calcein)  
203 loaded donor cells (D) are dropped onto a monolayer of acceptor cells (A) and the degree of dye  
204 spread to the monolayer (A/D ratio) is measured over 10-15 fields in an automated confocal  
205 microscope over time (**Fig. 3 A and B**). Given the changes in GJ gene expression between normal  
206 and endometriosis patients in **Fig. 1**, it was surprising that GJIC did not change significantly in  
207 either cell type, although a small decrease was seen in ESCs and increase in EECs (**Fig. 3C**).

208 However, as endometriosis is characterized by invasive behaviors following interactions with the  
209 peritoneal mesothelium, we also assessed heterotypic GJIC between endometrial cells and a  
210 peritoneal mesothelial cell (PMC) line (LP9). This revealed a dramatic induction of GJIC that was  
211 most notable in ESCs from endometriosis patients (4 fold increase compared to 2 fold in normal  
212 subjects). While some induction was also observed in EECs, this was not significant in either  
213 normal or endometriosis samples (**Fig. 3C**). This induction occurred relatively rapidly, within the  
214 context of the assay (~ 2 hours).

215 Given this time course, which seemed inconsistent with a transcriptional event, we  
216 examined the distribution of Cx43 protein in ESCs alone, and after contact with PMCs. Alone,  
217 both stromal (**Fig. 3D**) and mesothelial cells (not shown) show primarily intracellular Cx43  
218 staining. By contrast, in heterotypic cultures, very little intracellular staining is seen within ESCs  
219 (fluorescent green labelled cell in **Fig. 3E**), but plaques are readily observed at sites of contact  
220 with PMCs (yellow arrows, **Fig. 3E**), although significant intracellular labeling within PMCs was  
221 still evident. This suggests that the heterotypic contact may trigger enhanced trafficking of Cx43  
222 to the cell surface.

223 Since the major functional difference we observed related to gap junctions in samples  
224 from endometriosis patients were associated with heterotypic contacts with mesothelial cells,  
225 especially by ESCs, we predicted that they may influence differential adhesion between the cells.  
226 To measure the degree to which heterotypic adhesion properties with mesothelial cells differ  
227 between EECs and ESCs, we used atomic force microscopy (AFM) that enables quantitative  
228 assessment of the extent of intercellular interactions (Sancho et. al., 2017; Roca-Cusachs et.al.,  
229 2017). Adhesiveness between PMCs (LP9 cells), and EECs and ESCs from endometriosis  
230 patients was measured by attaching a single cell to a cantilever of an AFM probe (**Fig. 4A**). The  
231 attached cell was placed in contact with a monolayer of either the same cell, or a different cell  
232 type, growing on a culture dish, and the force needed to separate the probe-attached cell from  
233 the plate-attached cell was measured (**Fig. 4B**). Mesothelial cells show low levels of adhesion to  
234 one another that was similar to their adhesion to EECs. In contrast, ESCs showed significantly  
235 higher adhesion to PMCs (**Fig. 4C**). This data is consistent with ESCs being the cell type that is  
236 the major invasive front into the mesothelium (Nair et.al., 2008; Burney and Giudice, 2012).

### 237 238 **Invasive Potential of Endometrial Cells from Normal Subjects and Endometriosis Patients,** 239 **and dependence on GJIC**

240 We then directly assessed the invasiveness of primary endometrial cells from normal and  
241 endometriosis patients using an established 3D-invasion assay that assessed the efficiency with  
242 which ESCs or EECs can pass through a confluent monolayer of PMCs grown on a growth-  
243 hormone depleted Matrigel-coated membrane (**Fig. 5A**). Initial studies using unseparated  
244 endometrial cells showed significantly greater invasiveness in samples from endometrial patients  
245 than control subjects (n=3; **Fig. 5B**). For ESCs (n=3 and 6 for control and endometriosis,  
246 respectively) and EECs (n=3 and 6 for normal and endometriosis, respectively) the differences  
247 were not significant. In all cases tested the level of invasion was not seen when endometrial cells  
248 were dropped on a membrane alone, so that the invasion was dependent on contact with a  
249 mesothelial monolayer (data not shown).

250 Given that we had demonstrated that we had demonstrated that endometrial cell contact  
251 with mesothelial cells specifically induced GJIC, we tested the degree to which invasive behavior  
252 was dependent on GJIC by targeting Cx43, the dominantly expressed Cx in both cell types (**Fig.**  
253 **S2**). Four approaches were used to test this. Firstly, we pre-treated both PMCs and endometrial  
254 cells (not separated into ESCs and EECs) with GAP27, a peptidomimetic to the extracellular  
255 domain of Cx43 that we, and many others (Evans and Leybaert, 2007), showed blocked the  
256 formation of gap junctions between newly contacting cells, in this case by ~85%. This reduced

257 invasiveness of unseparated endometrial cells from control subjects by 57% (although not  
258 significant at the 0.05 level), and from endometriosis patients by 70% ( $p < 0.01$ ) (**Fig. 6A**).

259 Secondly, we tested purified ESCs (as only they showed increased adhesiveness to  
260 PMCs (**Fig. 4**)), using a combination of two siRNAs targeted to Cx43, where the PMC monolayer  
261 was transfected immediately prior to the invasion assay. This caused an average of  $65 \pm 9$  %  
262 reduction in Cx43 protein (**Fig. 6B**) and ~70% reduction in GJIC between endometrial and  
263 mesothelial cells ( $p < 0.001$  in control and  $< 0.0005$  in endometriosis) (**Fig. 6C**). Invasiveness was  
264 reduced by 30-40% ( $p < 0.05$  in control, and  $< 0.02$  in endometrial samples) (**Fig. 6D**). In all cases,  
265 Cx43 siRNA effects were compared to effects by either a scrambled siRNA, or siRNA directed to  
266 GAPDH.

267 Thirdly, in order to avoid any negative effects of the transient transfection process for  
268 siRNA on the integrity of the PMC monolayer, or invasive potential of ESCs, we prepared stably  
269 expressing LP9 cells and ESCs from a normal and endometriosis patient (172 and 163,  
270 respectively), by infection with lentivirus that either expressed shRNAs targeted to Cx43 that were  
271 inducible by doxycycline. In the presence of doxycycline, shRNA suppressed Cx43 protein levels  
272 by  $35 \pm 6$  % (**Fig. 6E**), and GJIC was by  $88 \pm 4$  % in the cell types tested (**Fig. 6F**). Invasive  
273 behavior was also inhibited by  $86 \pm 2$  % when Cx43 was suppressed in the ESCs from either  
274 control or endometriosis patients, or in the PMCs (**Fig. 6G**).

275 Finally, we used the same Lentivirus system to express a dominant negative Cx43  
276 construct, Cx43 T154A (DN Cx43), which we have previously shown preserves normal gap  
277 junctional plaque structures, but fails to open functional channels, and prevents the opening of  
278 co-expressed wt Cx43 (Beahm et.al, 2006). Expression of DN Cx43 increased total Cx43 levels  
279 by 2 fold in ESCs and 1.4 fold in PMCs (**Fig. 6E**), decreased GJIC by 90% (**Fig. 6F**) and invasive  
280 behavior by a remarkable 98-99%, whether expressed in ESCs or PMCs (**Fig. 6G**).

281 This analysis clearly shows that both EECs and ESCs can be invasive across a  
282 mesothelium, and that this is even true when they are derived from control subjects, although the  
283 levels are higher in cells from endometriosis patients. Three independent treatments that  
284 specifically block either functional GJIC between ESCs and PMCs (GAP27 or DN CX43) or  
285 expression of Cx43 in either of the cell types, greatly reduce the invasive behavior in both control  
286 and endometrial samples. Tests on EEC invasiveness (data not shown) showed similar  
287 dependence of invasiveness on Cx43, but the higher variability between samples from different  
288 patients led to the effect not being significant at the 0.05 level.

289

## 290 **AFM analysis of ESC effects on the PMC monolayer**

291 Given the clear dependence of invasiveness of ESCs through the mesothelium on Cx43  
292 mediated GJIC, we turned to AFM to provide insights into how this occurs. We specifically probed  
293 the influence of ESCs, in the presence or absence of Cx43, on the “barrier function” of the  
294 mesothelium (i.e. the “tightness” of contact between PMCs that prevent transmigration of cells).  
295 ESCs from a control subject (172) or endometriosis patients (169 and 170) were first labeled with  
296 the membrane dye DiO, and dropped onto a PMC monolayer at a ratio (ESC:PMC) of 1:20. After  
297 ~3 hrs, the monolayer was imaged with AFM by pressing it with a ‘sharp’ conical probe at a  
298 constant pressure of 1 nN to obtain a 3-D contour map of the monolayer (**Figs. 7A-B**). This readily  
299 allowed the interfaces between cells to be identified (**Fig. 7C**), and to measure the depth of  
300 penetrance between cells. ESCs from several patients all induced an increase in penetrance,  
301 measured ~10um away (~2 cell diameters) from site of the dropped cells, identified based on prior  
302 DiO labeling (**Fig. 7D**). This was also evident as a widening in the gap between cells (compare  
303 **Figs 7A and B**). This effect on penetrance between cells was most pronounced in ESCs from an  
304 endometriosis patient (169) compared to a control patient (171) (**Fig. 7D**), and also showed a

305 dependence on the density of ESCs, as penetrance was less when a 1:50 ratio of ESCs:PMCs  
306 was used instead of 1:20 (data not shown). We have also conducted a similar test using an AFM  
307 probe to which a 3  $\mu$ M diameter glass bead is attached to mimic the shape of a cell, and similarly  
308 shown that ESCs induce greater ability for larger objects to penetrate the monolayer (data not  
309 shown).

310 We then used the shRNA, DN Cx43 and wt Cx43 infected LP9 cells, characterized in **Fig.**  
311 **6E**, to test the dependence of these changes on Cx43 GJIC. First, we observed that the “barrier  
312 function” of mesothelial cells alone (i.e. in the absence of ESCs) was dependent on Cx43  
313 expression, as the degree of penetrance was reduced when Cx43 was overexpressed, and  
314 increased when Cx43 was inhibited by shRNA (**Fig. 7E**). Strikingly, this effect was exactly inverted  
315 when we introduced ESCs, as now Cx43 overexpression significantly increased penetrance, while  
316 Cx43 inhibition by shRNA completely eliminated the effect of ESCs, so that penetrance was the  
317 same as in their absence. This effect was due to the channel forming role of Cx43, as the same  
318 reduction in penetrance was observed in LP9 cells infected with a DN Cx43, which would  
319 preserve, or even enhance, any adhesive functions of Cx43 between ESCs and PMCs.

320

## 321 **DISCUSSION**

322 Invasive processes of any cell into a “foreign” environment occurs in many instances, both  
323 normal (during development, extravasation, blastocyst implantation) and pathological  
324 (metastasis) and involve close intercellular interactions. While the need for initial adhesion events  
325 has long been recognized, it has become increasingly evident that the formation of heterotypic  
326 gap junctions between the invading and target tissue is an early event in implantation (Grummer  
327 et.al., 1996), extravasation (el Sabban and Pauli, 1991, 1994; Ito et.al, 2000, Naoi et.al, 2007)  
328 and metastasis (Lamiche et.al., 2012; Stoletov, et.al., 2013; Hong et.al, 2015; Cheng et .al.,  
329 2015). However, despite endometriosis being the most common form of pathological invasiveness  
330 (affecting 10% of women worldwide), there are few studies on the molecular characterization of  
331 gap junctions, (or other intercellular junction components) in this disease. Herein, we sought to  
332 determine if dysregulated expression of these endometrial genes associated with disease status

333 **Expression of GJ and other genes:** In a test sample of 6 endometriosis patients and 2 healthy  
334 controls, we found highly significant shifts in the expression of several junctional genes and  
335 proteins that regulate junctional contacts transcriptionally and post-transcriptionally. The most  
336 predictive change associated with endometriosis was in the gap junction (*GJ*) gene family  
337 encoding connexins, specifically in terms of the subpopulation of cells showing high *GJ*  
338 expression (**Fig. 1A-D**). This became even more evident in a cell clustering analysis, which  
339 demonstrated that the only group of cells where fraction of the cell population reliably tracked  
340 disease progression were those characterized by high *GJ* expression with (**Fig. 2**). This pattern  
341 has likely escaped prior screens of endometrial tissue using bulk PCR approaches, as the  
342 changes in *GJ* gene expression in the two major cell types of the endometrium were in opposite  
343 directions, with stromal cells showing decreased expression (**Fig 1C**), and epithelial cells  
344 evidencing upregulation (**Fig 1D**) as disease stage increased.

345 Notably, these changes were not restricted to the connexins expressed most abundantly  
346 in the endometrium (Cx43, 26 and 32), but applied to most of the *GJ* gene members screened. It  
347 was also notable that Cx43 was the dominantly expressed Cx in both ESCs and EECs. For the  
348 former, this was consistent with what has been reported in the literature, but EECs have been  
349 reported to display mostly Cx26 and Cx32 expression in eutopic endometrium (Jahn et.al., 1995).  
350 This has been shown to switch to Cx43 in ectopic lesions (Regidor et.al., 1997), and even  
351 eutopically in a baboon model of endometriosis (Winterhager et.al., 2009). While it is possible that  
352 the short time in culture modified this expression pattern of EECs in our study, it is also possible



353 that the switch to Cx43 occurs very early in release of cells from the endometrial lining, even in  
354 normal subjects. In either event it is clear that the expression of Cx43 is greatly enhanced in EECs  
355 from endometriosis patients compared to control, even while they are still resident in the eutopic  
356 endometrium.

357 In terms of other genes involved in intercellular interactions, many do not show consistent  
358 changes, at least in both cell types, but two genes associated with adhesion (EpCAM and  $\beta$ -  
359 catenin) show the same expression shifts as the *GJ* genes, while Snail 1, a master transcriptional  
360 repressor that promotes endothelial to mesothelial transition (EMT), shows the opposite pattern.  
361 This is consistent with the demonstrated suppressive effect Snail 1 has been shown to have on  
362 Cx43 (deBoer et.al., 2007), and the promotion of a migratory phenotype in ESCs, and its  
363 repression in EECs. However, it is not clear if in this instance Snail1 is activating a typical EMT  
364 response, as the expression of E-cadherin, which is a primary target for suppression by Snail1,  
365 was not detected in the endometrium, and N-cadherin, the expression of which is normally  
366 increased by Snail1, increases in endometriosis EECs coincident with a Snail 1 decrease.  
367 Furthermore, the increase in Snail1 in ESCs is associated with a reduction in  $\beta$ -catenin levels,  
368 which may limit EMT effects as they typically depend on activation of  $\beta$ -catenin signaling. This is  
369 consistent with the view that EMT transitions in endometriosis are only partial (Konrad et.al.,  
370 2020).

371 With regard to kinases that regulate many intercellular junctional components, it is notable  
372 that the cells with the highest *GJ* expression (control ESCs and endometriosis EECs) in general  
373 show the lowest expression of most kinase genes (see heat maps in **Fig. 1 A-B**), suggesting an  
374 inhibitory relationship. However, in terms of global kinase levels, the only kinases to show  
375 significant shifts with endometriosis were PKA gamma in both ESCs and EECs, and MAPK1 in  
376 EECs (**Fig. 1E-F, and Fig. S2B**), all of which changed in the same direction as the *GJ* genes.  
377 This is a striking example of how overall expression levels can be misleading when compared to  
378 the details of expression patterns at the single cell level.

379 **GJIC and invasiveness:** These expression profiles initially pose an interesting conundrum, as  
380 stromal cells are thought to be the primary compartment involved in endometriotic lesion  
381 formation (Lucidi et.al., 2005; Burney and Giudice, 2012), and show the greatest EMT-like  
382 response in endometriosis (see above), yet they also show repressed levels of Cx43, which is  
383 needed for invasive behavior in metastasis and extravasation. However, functional studies reveal  
384 that ESCs, while poorly coupled homotypically, show a dramatic induction of heterotypic coupling  
385 when contacting mesothelial cells that is greatly enhanced in endometriosis samples (**Fig. 3C**).  
386 This induction, linked to increased trafficking of Cx43 to the cell surface (**Fig. 3D and E**), is very  
387 analogous to what has been observed in breast cancer, where internalized Cx43 and 26 in the  
388 primary tumor, traffics to the surface in lymph node metastases (Kanczuga-Koda et.al., 2006).  
389 Enhanced heterotypic coupling with capillary endothelia (el Sabban and Pauli, 1991, 1994; Ito  
390 et.al., 2000) or target tissues (Lamiche et.al., 2012; Hong et.al., 2015) have been shown to be  
391 critical to invasive behavior during early metastasis.

392 The importance of the enhanced heterotypic coupling between ESCs and PMCs, unique  
393 to endometriosis, to their invasiveness across the mesothelium was demonstrated using four  
394 different modes of inhibition of Cx43. Specifically, invasion was not only inhibited by suppression  
395 of Cx43 expression (**Fig. 6D and G**), but also by a peptide blocker GAP27 (**Fig. 6A**), which inhibits  
396 all channel function, but leaves protein expression unaffected, and by DN Cx43 expression (**Fig.**  
397 **6G**), which actually increases protein levels (**Fig. 6E**) and gap junction structures (Beahm et.al.,  
398 2006), but blocks all channel activity. Notably, inhibition of invasion is the same whether Cx43  
399 function is ablated in ESCs or PMCs (cf. shRNA and DN Cx43 treatments for 163S and 169S in  
400 **Fig. 6G**). This suggests that heterotypic GJIC likely triggers the invasive behavior, which, as we  
401 demonstrate with AFM (**Fig. 7**), is associated with increased separation between PMCs, likely

402 resulting from a disruption of the adhesion and tight junctions between the cells (i.e. breakdown  
403 of the “barrier function”), akin to what happens during extravasation (Ito et.al., 2000; Reymond  
404 et.al., 2013).

405 In **Fig. 8** we present a summary of how interactions between the mesothelium and  
406 endometrial cells arriving in the peritoneum by retrograde menstruation differ in normal and  
407 endometriosis patients, resulting in lesion formation. The enhanced GJIC seen in endometriosis  
408 ESCs (**Fig. 8B**) would allow signals, indicated by green triangles, to pass effectively from  
409 endometrial cells to the mesothelium, where they are further propagated through GJIC, to  
410 promote disruption of “barrier function” between PMCs, allowing invasion. Interestingly, in the  
411 absence of signals from ESCs, GJIC was shown to be important to maintenance of the barrier  
412 function (**Fig. 7E**). This may also be why DN Cx43 was more effective in preventing invasion than  
413 Cx43 knock-down by sh- or si-RNA (**Fig. 6G**), as it may reinforce the barrier functions by  
414 enhancing adhesiveness between PMCs. The model emphasizes how increased receptiveness  
415 of the ESCs to form heterocellular gap junctions in endometriosis can lead to invasive lesion  
416 formation. However, it is also possible that they endometriotic ESCs may make more of the  
417 hypothetical signals that induce disruption of the barrier function, emphasizing the importance in  
418 identifying such factors. It should be noted that we cannot definitively exclude involvement of  
419 factors released through Cx43 hemichannels in the invasive process, but there are no obvious  
420 signals that would induce their opening in these experiments, and effects on invasion are the  
421 same independent of the cell in which Cx43 is inhibited.

422 Much remains to be done to identify the intercellular signals that mediate barrier function  
423 disruption, and also to understand reciprocal effects of the mesothelium on the ESCs, aside from  
424 the demonstrated induction of heterotypic gap junction formation. However, the current study  
425 clearly implicates changes in gap junction expression in the earliest phases of the development  
426 of endometriosis, and their critical role in initiating lesion formation. They also demonstrate that  
427 changes within the uterine endometrium prime these cells to be invasive once they reach the  
428 peritoneal cavity, in much the same way that the metastatic potential of cancer cells is determined  
429 as they leave the primary tumor, suggesting that understanding each of these processes will  
430 inform the other.

431

## 432 **MATERIALS AND METHODS**

### 433 **Primary endometrial epithelial cell isolation from endometrial biopsies**

434 Primary ESCs and EECs were isolated from endometrial biopsies obtained from women with and  
435 without endometriosis. All women provided informed consent prior to participating in this  
436 Institutional Review Board approved protocol. Study subjects were premenopausal women  
437 between 20 and 45 years of age with regular menstrual cycles undergoing laparoscopic surgery  
438 for gynecologic indications (**Table 1**). Women with pelvic inflammatory disease/hydrosalpinx,  
439 endometrial polyps, or submucosal fibroids were excluded. Endometriosis was staged according  
440 to the revised ASRM criteria and confirmed by histopathologic review of peritoneal or cyst wall  
441 biopsy in all cases. Fertile women undergoing tubal sterilization and without endometriosis at  
442 surgery were considered healthy controls. Menstrual cycle phase (proliferative or secretory) was  
443 determined by cycle history and confirmed by serum estradiol and progesterone levels.  
444 Endometrial tissue was obtained by pipelle biopsy at the time of laparoscopic surgery.

445 The biopsy material was dissociated by shaking in 5mg/ml collagenase and 2.5mg/ml  
446 DNase in Hanks Balanced Salt Solution at 37°C for 1 hour. Isolation of primary ESCs and EECs  
447 from the biopsies was performed using a combination of straining (45uM nylon filter) and  
448 differential sedimentation (EECs cluster and sediment faster), followed by differential attachment

449 (EECs adhere less well to culture plates), in a modification of the method developed by Kirk and  
450 Irwin (1980) used in prior studies De La Garza, et.al., 2012; Chen et.al., 2016). In some  
451 experiments the differential attachment step was replaced by using an Ep-CAM affinity column to  
452 enrich EECs. Both methods achieve about 97% purity for EECs and ESCs, as illustrated in **Fig.**  
453 **S1** by immunostaining for epithelial [EpCAM (ab71916 from Abcam) and CK 7 (ab902 and 1598  
454 from Abcam)] and stromal [Vimentin (MA1-10459 from Thermo Fisher; NBP1-92687 from  
455 NovusBio)] markers. Gene analysis was performed exclusively on P0 or P1 cells, while functional  
456 tests of coupling and invasion used cells between P0 and P5 (ESCs) or P0 to P3 (EECs).

457

## 458 **Cell Culture**

459 Primary ESCs were cultured in Dulbecco's Modified Eagle Medium (DMEM)/F12 (1:1) (Gibco,  
460 Buffalo, NY) containing antibiotic/antimycotic mix (Gibco, Buffalo, NY), 10 µg/ml insulin (Sigma,  
461 St. Louis, MO) and 10% heat inactivated fetal bovine serum (FBS - Gibco, Buffalo, NY) as  
462 described previously (Ferreira *et al.*, 2008). EECs were cultured in MCDB/Medium 199/MEM $\alpha$   
463 (1:1:0.6) containing antibiotic/antimycotic mix, 10ug/ml insulin, D-Glucose (0.45%) (Sigma, St.  
464 Louis, MO), GlutaMax and 10% FBS (Gibco, NY). Prolonged culture was in defined KSFM with  
465 supplement, 1% FCS, and antibiotics/antimycotics (Gibco, NY) to preserve differentiated state of  
466 the EECs (Chen et.al., 2016) although this generally was only possible to 3 - 4 passages. All  
467 experiments were performed using low passages ( $\leq 5$  for ESCs  $\leq 3$ ) to avoid loss of differentiated  
468 characteristics. Established LP9 cells (Corriell Cell Repositories, Camden, NJ) were used as a  
469 model for peritoneal mesothelial cells and cultured as described previously (De La Garza, 2012,  
470 Liu *et al.*, 2009) and grown in MCDB 131.Medium 199 (1:1 - Gibco, NY) with 15% FBS, sodium  
471 pyruvate, GlutaMax, antibiotic/antimycotic mix (Gibco, NY), hEGF (20ng/ml) and hydrocortisone  
472 (0.4ng/ml) from Sigma, St. Louis, MO. Previous studies, including our work, have validated and  
473 used LP9 cells as a model for peritoneal invasion by endometrial cells (Nair et.al., 2008)

474

## 475 **Single-cell RNA expression of a connexin gene panel by microfluidic PCR**

476 Automated single cell isolation and processing for cDNA amplification was performed in the C1  
477 (Fluidigm Inc) system, using the C1 integrated fluidic circuit (IFC) chips. Captured single cells  
478 were visually confirmed by viewing the microfluidic wells of the C1 IFCs on an inverted light  
479 microscope. Empty wells or those containing doublets were excluded. Single-cell cDNA from the  
480 IFC chips is then subjected to microfluidic PCR amplification in the Biomark platform (Fluidigm,  
481 Inc), using Biomark PCR IFC chips with 1936 (48x48) or 9216 (96x96) microfluidic wells (Polusani  
482 et.al., 2019). The gap junction gene panel and corresponding PCR primer sequences for  
483 expression profiling selected from the PrimerBank database  
484 (<http://pga.mgh.harvard.edu/primerbank>) are outlined in Supplemental Table 1. In each Biomark  
485 chip assay, universal RNA (200 pg) from human normal tissues (cat #4234565, BioChain,  
486 Newark, CA) and no template control (NTC) served as positive and negative controls,  
487 respectively. Valid PCR products were determined by amplicon melting temperature curves of  
488 each gene. Expression values were determined based on cycle threshold (Ct) normalized to the  
489 housekeeping gene Actin. For cell quality control, UBB and Actin expression with Ct threshold of  
490  $>20$  were excluded (generally 1-3% of captured cells), as this was indicative of RNA degradation.

491

## 492 **Homotypic and Heterotypic GJIC Assays**

493 GJIC was measured using a novel automated parachute assay. Recipient cells are grown to  
494 confluence in a 96-cell flat bottomed plate, and the media changed to (Phenol Red-free DMEM,  
495 sodium pyruvate and 5%FBS – Assay Media) immediately before the assay. Donor cells in  
496 separate wells are incubated for 20 mins with 10uM calcein AM (Invitrogen), a membrane  
497 permeable dye that on cleavage by intracellular esterases becomes membrane impermeable, but

498 permeable to gap junctions. After washing, trypsinization and addition of assay media, ~2500  
499 calcein-labeled donor cells per well are dropped ('parachuted') onto the recipient cell layer, and  
500 calcein transfer between donor and recipient cells observed by fluorescent microscopic imaging  
501 (**Fig. 3A**). For homotypic interactions, ESCs, EECs or LP9 donor cells were parachuted onto  
502 recipient cells of the same type. For heterotypic GJIC assays, ESCs or EECs were parachuted  
503 onto LP9 recipient cells. Fluorescent, bright field and digital phase contrast images of 10-15 fields  
504 per well were captured on an Operetta automated microscope (Perkin Elmer) at 30 min intervals  
505 for approximately 2 hours. A program (developed in consultation with Perkin Elmer) allowed  
506 identification of all cells on the plate, (from phase contrast image), original donors (5-15 per field),  
507 and dye-filled recipients (based on calcein intensity – see **Fig. 3B**). Data are expressed as # of  
508 fluorescent recipient cells/# of donor cells for each condition (R/D ratio), plotted over time, and a  
509 linear regression line drawn through the data, with the slope used as a measure of coupling (**Fig.**  
510 **3C**) and regression coefficient (mostly >0.8) used as a measure of assay reliability.

511

### 512 **Trans-mesothelial Invasion Assay**

513 The 3-D invasion assay modeling trans-mesothelial invasion (**Fig. 5A**) has been described  
514 previously (De La Garza et.al., 2012, Ferreira *et al.*, 2008, Nair *et al.*, 2008). Briefly, LP9 peritoneal  
515 mesothelial cells (PMCs) were grown to confluence in 24-well invasion chamber inserts containing  
516 growth-factor-reduced Matrigel™, coated on 8-µm pore membranes (Corning, NY). ESCs or  
517 EECs were then labeled with CellTracker Green® or DiO (Invitrogen), trypsinized and counted,  
518 prior to dropping onto the confluent layer of LP9 PMCs in the prepared inserts (~20,000 cells per  
519 insert), at which time the media below the insert was changed to the appropriate media for the  
520 invading cell (ESC or EEC). After 24 hr. incubation, non-invading cells on the upper surface of the  
521 insert were mechanically removed. Invading cells on the bottom of the membrane insert, were  
522 stained with DAPI, and 10 fields counted using an Inverted Nikon 2000 fluorescence microscope  
523 with 20x objective. Invasion assays for each cell type were performed in triplicates.

524 To test the role of gap junctions in the invasive process, we initially pretreated both the  
525 monolayer and dropped cells for 24 hours with 300uM GAP27 (Zealand Pharma, Copenhagen,  
526 Denmark), a peptidomimetic of the extracellular loops of Cx43 which competitively blocks Cx43  
527 gap junction formation. Due to difficulties in obtaining consistently active peptide preparations, we  
528 subsequently shifted to 24 hour pre-treatment of the LP9 monolayer with a combination of two  
529 siRNAs to Cx43 (10 pmoles/well or 5nM final concentration) - Ambion™ Silencer™ Select) in Opti  
530 MEM (Gibco, NY) with RNAi MAX (1/100 dilution, Invitrogen), diluted 1:1 with assay media, per  
531 manufacturer's instructions. As the siRNA transfections done immediately prior to invasion could  
532 impact cell behavior, we also knocked-down Cx43 expression using 3 different shRNAs  
533 (Dharmacon, UK) introduced into either Endometrial or LP9 Mesothelial cells via Lentivirus  
534 (carrying an RFP reported driven by a separate promoter) infection. Average infection efficiency  
535 was 58% (range 30-80%). In assessing invasion, cells expressing shRNA were identifiable as  
536 RFP positive, while unlabeled cells in the same experiment served as internal controls.

537

### 538 **AFM measurements of cell-cell adhesion and mesothelial integrity.**

539 We applied a Nanoscope Catalyst AFM (Bruker) interfaced with an epifluorescent inverted  
540 microscope Eclipse Ti (Nikon). AFM images were acquired with the Peak Force Quantitative  
541 Nanomechanical Mapping (QNM) mode with cells immersed in appropriate culture media.  
542 ScanAsyst probes (Bruker) with the nominal spring constant 0.4 N/m were used for imaging. The  
543 exact spring constant for each probe was determined with the thermal noise method (Butt and  
544 Jaschke, 1995). For each cell culture dish, at least 5 fields 100 by 100 µm were collected with the  
545 Peak Force set point of 2nN, and electronic resolution of 256 by 256 pixels. Nanomechanical data  
546 were processed with Nanoscope Analysis software v.1.7 (Bruker) using retrace images. Then,

547 the Sneddon model (Sneddon, 1965) and the rules established by Sokolov (Sokolov and Dokukin,  
548 2014) were applied for calculations of mechanical parameters.

549 **Cell to cell adhesion:** We attached a tester cell to a tipless probe MLCT-O10 (Bruker, cantilever  
550 A, spring constant 0.07N/m) using polyethyleneimine (PEI) as a glue (Friedrichs et. al., 2013)  
551 (**Fig. 4**). Briefly, the probes were immersed in 0.01% PEI in water for 30 min. Tester cells  
552 attachment to a culture dish was weakened by replacement of the culture medium with a non-  
553 enzymatic cell dissociation solution (Millipore) for 15-30 min in a cell culture incubator (37°C,  
554 5%CO). Next, a single tester cell loosely attached to a culture dish was attached to a PEI covered  
555 cantilever by pressing it at 1 nN for 5-10 min. After visual inspection of successful cell attachment,  
556 the tester cell was lifted and transferred to a dish containing single tested cells. Then the tester  
557 cell was positioned over a tested cell and the cantilever slowly lowered till detection of cell-cell  
558 interactions with a force plot. The cells were left interacting for 30 to 180 sec at forces 0.5 to 5 nN  
559 and then the tester cell was lifted. During this step a force plot was recorded and the collected  
560 data applied to calculate cell – cell adhesion parameters. The force plots were baseline corrected  
561 and a maximum of adhesion between cells during their detachment was calculated (units of force,  
562 Newton) (Taubenberger, Hutmacher, and Muller 2014; Dufrêne et al. 2017).

563 **Integrity of LP9 layer:** LP9 cells were grown to confluence in a 60mm culture dish (**Fig. 7**). ESC  
564 cells grown in separate wells were stained with DiO, suspended, and dropped on to the LP9  
565 monolayer at either a 1:50 or 1:20 ratio to the LP9 cells. Three hours later the cells were imaged  
566 by AFM. To calculate a tip penetration depth, cell boundaries were identified using images  
567 collected by the peak force error (PFE) channel. To exclude gap areas between cells or areas of  
568 cells growing in multilayers, PFE images were overlaid with height channel images after  
569 processing them with the flatten function of 1<sup>st</sup> order. Tip penetration was calculated based on a  
570 height histogram of all data points using a difference between the prevalent maximum of cell  
571 monolayer height and the prevalent maximum depth between cells accessible for the tip.

572  
573

### Data and Statistical Analysis

574 For microfluidic PCR analysis, cycle thresholds (Ct) were used to calculate gene expression  
575 relative to the housekeeping (HK) gene *ACTIN*. Relative expression was calculated by the formula  
576  $2^{-\Delta Ct}$ , where  $\Delta Ct = Ct_{gene} - Ct_{HK}$ . Heat maps were generated for data visualization by MeV  
577 (<http://mev.tm4.org/>). In addition, violin plots were used to visualize single-cell expression  
578 distribution. To statistically assess this distribution between samples, Duncan's multiple range  
579 test by R package was used to compare expression in different patient samples. For statistical  
580 analysis of cell assays, the Shapiro-Wilk normality test was first performed. t-test and ANOVA  
581 (with Holm-Sidak post-hoc analysis) were used as parametric assays after normality of data was  
582 ensured. In cases where normality test failed, Mann-Whitney rank sum test was used as a  
583 nonparametric analysis method. P values  $\leq 0.05$  were considered statistically significant. As  
584 data on GJIC and invasion of ESC and EEC populations from patients was normally distributed,  
585 comparisons utilized two tailed student t-tests, with a cut-off of  $p < 0.05$  (degrees of freedom  
586 ranged from 8 – 20). Statistical tests of all AFM data were performed and corresponding graphs  
587 prepared with OriginPro 2000b (Origin Lab). All data showed normal distribution by Shapiro-Wilk,  
588 except the 170S-LP9 (Cx43) data set in Fig. 7F, which did not pass the Kolmogorov test of normality.  
589 P values were corrected using the more stringent Shapiro method.

590  
591

### Cell Cluster Analysis

592 Single cells were clustered based on the normalized expression values using an in-house graph-  
593 based community discovery algorithm. Briefly, the algorithm starts by computing the Euclidean  
594 distances between pairs of cells, and then constructs k nearest neighbor graph, where each cell  
595 is connected to k cells that are closest to it. The best k is chosen by the algorithm with a

596 topologically inspired criterion (Ruan, 2009). Finally, a community discovery algorithm optimizing  
597 the well-known modularity function is applied to find dense subgraphs as cell clusters (Ruan and  
598 Zhang, 2008). Note that the number of clusters is determined automatically during the optimization  
599 process.

600

601 **ACKNOWLEDGEMENTS:** We would like to express gratitude to the members of the members  
602 of the High-Throughput Screening Facility who helped with the assessment of GJIC, particularly  
603 Srikanth Polusani, the members of the clinical teams who helped in collection of patient samples,  
604 particularly Jessica Perry at UTHealth SA, and Peter Binkley curator of the UTHealth SA Ob/Gyn  
605 tissue bank. We would also like to thank Taryn Olivas and Taylor Williams who made critical  
606 contributions to the early characterization of patient samples. We would like to also acknowledge  
607 the CPRIT-funded Bioanalytics and Single-Cell Core (BASiC) facility at the University of Texas  
608 Health San Antonio for C1 cell capture and microfluidic PCR analysis and the High-throughput  
609 Screening Facility (HTSF) in the CPRIT-funded Center for Innovative Drug Discovery (CIDD).  
610 Thanks to Mr. Nicholas Lucio at the BASiC facility for his assistance with running the C1 system,  
611 and Dr. Srikanth Polusani for running the Perkin Elmer Operetta system in the HTSF.

612

613 **FUNDING:** This work was supported by an award from the Women's Health Initiative through the  
614 Joe R. and Theresa Long School of Medicine (BJN and NBK), a Presidential Entrepreneurial Fund  
615 Award (NBK) and a pilot award from the Mays Cancer Center in conjunction with philanthropic  
616 donations from the Circle of Hope (BJN), all affiliated with UT Health San Antonio, as well as a  
617 pilot award from the Endometriosis Foundation of America (NBK). The BASiC facility at the  
618 University of Texas Health San Antonio is funded by the Cancer Prevention and Research  
619 Institute of Texas (CPRIT, grant # RP150600), and the HTSF is within the CIDD funded by CPRIT,  
620 (# [RP160844](#)) and the Institute for Integration of Medicine and Science (NIH-NCATS grant #[UL1](#)  
621 [TR 002645](#))

622

#### 623 **AUTHOR CONTRIBUTIONS:**

624 CWC and JC performed all functional experiments on cell coupling and invasion, isolated cells,  
625 and prepared them for single cell analysis; CWW, CMW, YTH and LLL conducted single cell  
626 analyses, and LLL and YTH performed statistical analyses; MJH designed and supervised the  
627 automated system for analysis of GJIC; JR performed all cell clustering analysis; LG isolated  
628 patient cells; ROB, RSS and RDR collected patient samples for analysis; MG and PO conducted  
629 all AFM experiments and analyses; NBK and BJN conceived and designed all experiments,  
630 coordinated patient sample collections and wrote the manuscript.

**TABLE 1: Patient database**

| <b>Patient</b> | <b>Endo stage</b> | <b>ethnicity</b> | <b>age</b> | <b>BMI</b> | <b><u>Menst. stage</u></b> |
|----------------|-------------------|------------------|------------|------------|----------------------------|
| 171            | Norm              | ND               | 35         | 27         | Mid sec                    |
| 172            | Norm              | <u>hispanic</u>  | 25         | 28         | Early sec                  |
| 164            | I-II              | Pac Is           | 30         | 28         | Early sec                  |
| 170            | III-IV            | white            | 30         | 22         | <u>prolifer</u>            |
| 002            | III-IV            | white            | 26         | 26         | Early <u>prolifer</u>      |
| 163            | III-IV            | white            | 23         | 25         | Early sec                  |
| 169            | III-IV            | white            | 37         | 23         | Mid sec                    |
| 003            | III-IV            | <u>hispanic</u>  | 31         | 31         | Non- <u>cycl</u>           |





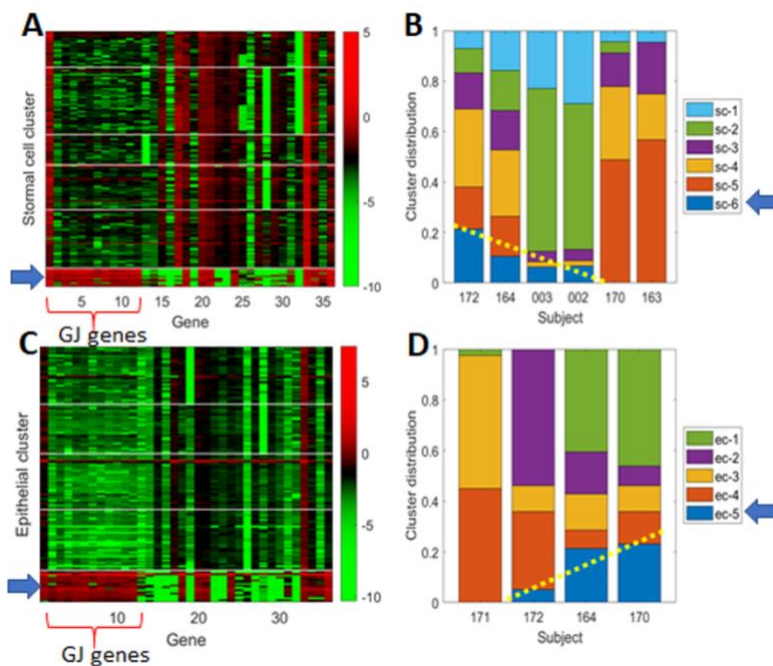

**Figure 2: Cell clustering analysis comparing control and endometriosis samples show progressive changes in the fraction of cells characterized by high GJ expression.**

Cells from ESCs (A) and EECs (C) were grouped into 6 and 5 clusters, respectively, based on patterns of gene expression across all patients, with the bottom clusters [sc6 for ESCs, and ec5 for EECs] characterized by high GJ expression. Following the distribution of each cluster in all patients, endometriosis patients have consistently lower percentages of subpopulation sc-6 (B), and higher percentages of subpopulation ec-5 (D) compared to controls (trends highlighted by yellow dotted lines).

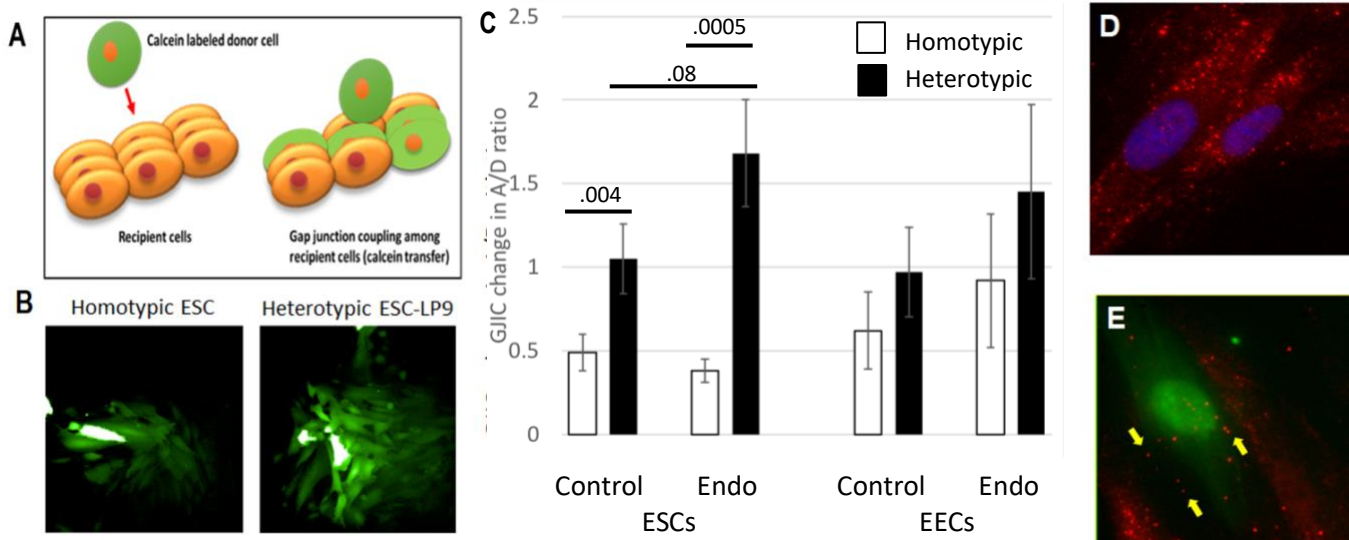

**Figure 3: Heterotypic coupling between ESCs and PMCs is dramatically induced in endometriosis.**

Gap junction intercellular coupling (GJIC) was measured by a modified “parachute assay” where calcein ester loaded donors are dropped onto a monolayer of acceptors, and dye transfer measured over time as a linear increase in fluorescent acceptor/donor ratio (A). This can measure homotypic (donor and acceptor the same), or heterotypic (endometrial donors and mesothelial acceptors) GJIC (B). Although there are slight changes in homotypic GJIC in ESCs and EECs consistent with the changes in expression levels of connexins, they were not significant (C-green bars). By contrast, heterotypic interactions with mesothelial cells (PMCs) caused a significant induction of GJIC, most notably in ESCs from endometriosis (C-black bars). Immunocytochemistry showed this was likely due to a redistribution of Cx43 (red) from primarily cytoplasmic in homotypic ESCs (D), to the interfaces of ESCs (green) and PMCs in heterotypic cultures (E). Samples tested: ESC control (8) and endometriosis (11); EEC control (8) and endometriosis (5), which included 2-4 biological replicates for each patient. Significance level was calculated by two tailed t-test.

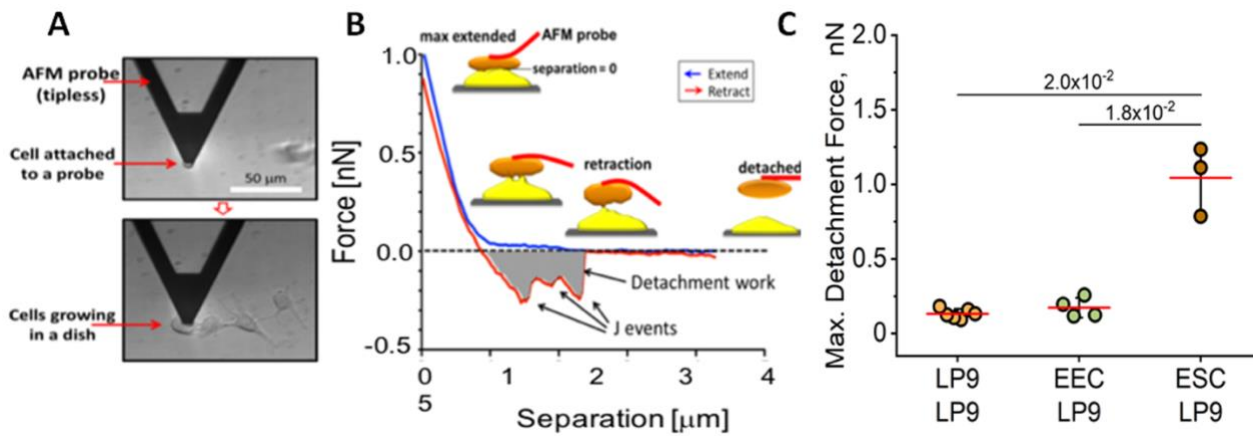

**Figure 4: Atomic Force Microscopy (AFM) demonstrates enhanced adhesion between ESCs and PMCs.**

Cells attached to an AFM tip are brought into contact with PMCs growing on a dish (A), and the force needed to separate them is measured (B). PMCs (LP9 cells) show similar adhesion to one another as to EECs, but much stronger adhesion to ESCs (C). Significance determined by two tailed t-test

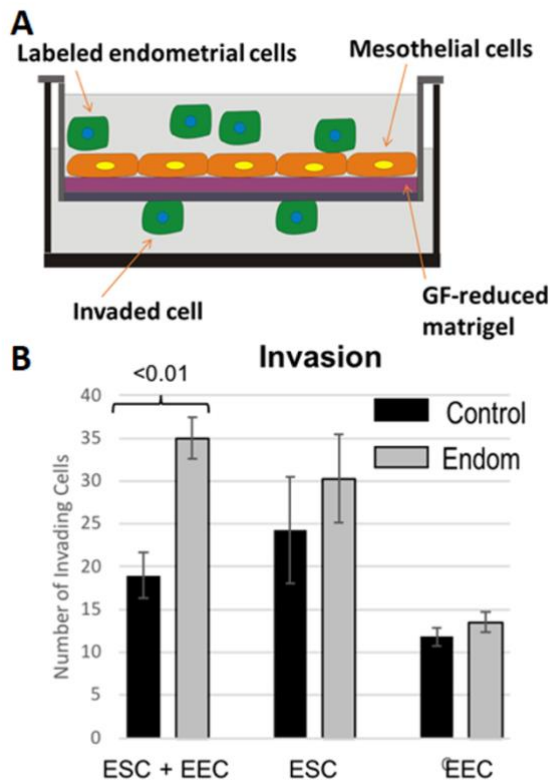

**Figure 5: Enhanced invasiveness of endometrial cells from endometriosis patients across a mesothelial monolayer.**

Using a 3-D model of endometrial cell invasion across a peritoneal cell monolayer (A), endometrial cells from patients show greater invasion than those from control subjects that was significant with a mix of ESCs and EECs (B). Number of independent patients tested - All Controls (3); Endometriosis – ESC+EEC (3 patients); ESC (5); EEC (4). Significance was determined by two-tailed t-test.

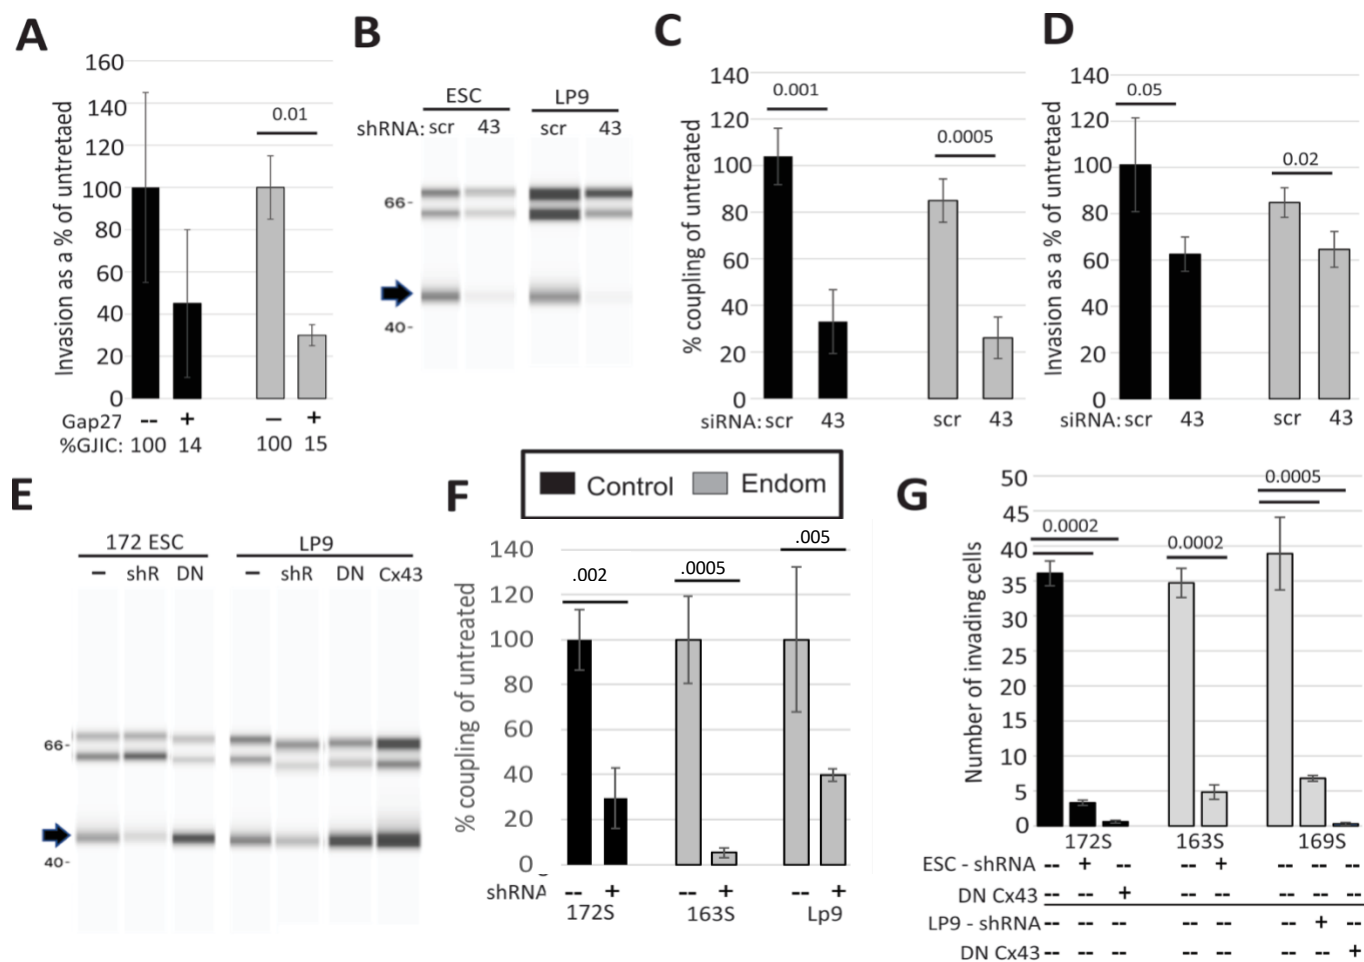

### Figure 6: Invasiveness of ESCs across a PMC monolayer is dependent on Cx43 GJIC:

**(A)** Averaging ESCs from all control (black bars, n=3) and endometriosis patients (grey bars, n=6), invasion was inhibited by a peptide inhibitor of GJ channels, GAP27 (percent GJIC compared to untreated shown below each bar).

**(B - D)** Cx43 siRNA transfection of either ESCs or PMCs (LP9) reduced protein levels of Cx43 (arrow) compared to Laminin A and B controls (upper bands) **(B)**, inhibited heterotypic GJIC compared to scrambled siRNA [Control n=5 (independent replicates from 2 patients); Endo n=8 (independent replicates from 5 patients)] **(C)**, and also inhibited invasion [Control n=6 (2-3 independent replicates of two patients); Endo n=14 (2-4 independent replicates of 6 patients)] **(D)**.

**(E - G)** Stable, doxycycline inducible shRNA infections of ESCs from a normal (172) and endometriosis (163) patient, as well as PMCs (LP9), reduced levels of Cx43 (arrow) compared to Laminin controls **(E)**, inhibited GJIC (n=3-7 independent experiments with 3 different shRNAs) **(F)** and invasiveness by ~90% [10 technical replicates of all samples; 3-4 biological repeats for +/- shRNA using 3 different shRNAs (controls were internal)] **(G)**. The block of invasiveness was observed independent of whether Cx43 expression was inhibited in ESCs or PMCs. DN Cx43 (which blocks channel function, but not protein assembly into GJs) was also expressed in ESCs and PMCs at approximately equal levels to wt Cx43 (total Cx43 levels doubled - **E**). This caused an even greater inhibition of invasiveness (~98% - **G**). All statistical significance based on one-tailed t-tests.

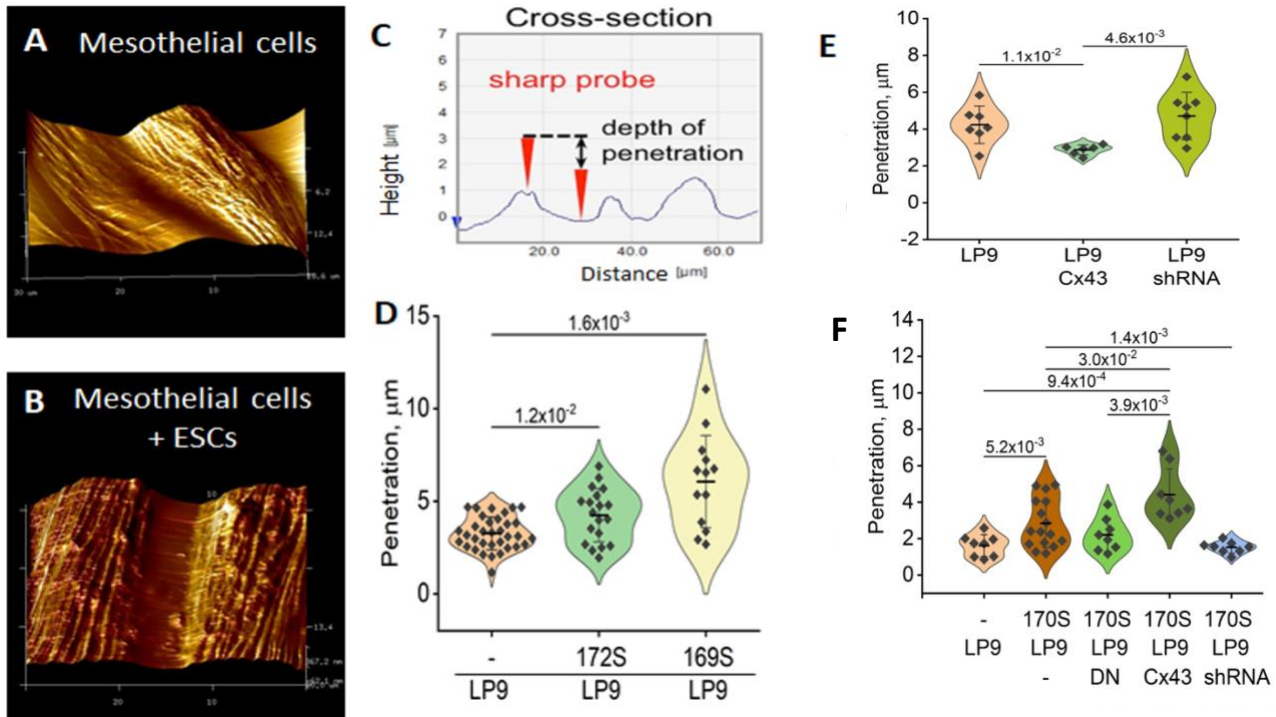

**Figure 7: AFM demonstrates that ESCs induce disruption of the barrier function of a mesothelial monolayer, which is dependent on Cx43 channels.**

The topology of the mesothelial monolayer surface shows a significant increase in the spacing between cells in the presence of ESCs (**A-B**). Using constant pressure, the tip can measure the depth of penetration between cells (**C**). This was increased from that measured in an LP9 PMC monolayer alone (n=25) when ESCs were dropped onto the monolayer, particularly from an endometriosis patient (169, n=19) compared to control (172, n=13) (**D**). Cx43 appears to help preserve the barrier function of the mesothelium alone, as overexpression reduced penetration, while Cx43 shRNA infection increased penetration in the PMC monolayer in the absence of ESCs (**E**). By contrast, in the presence of ESCs from a patient (170), Cx43 overexpression in PMCs enhances penetration, while blocking Cx43 with either shRNA or DN Cx43 neutralize the effect of ESCs (**F**). Each dot represents a cell measurement from plates prepared on the same day for comparison. Statistical tests of significance by two-tailed t-test (see methods).

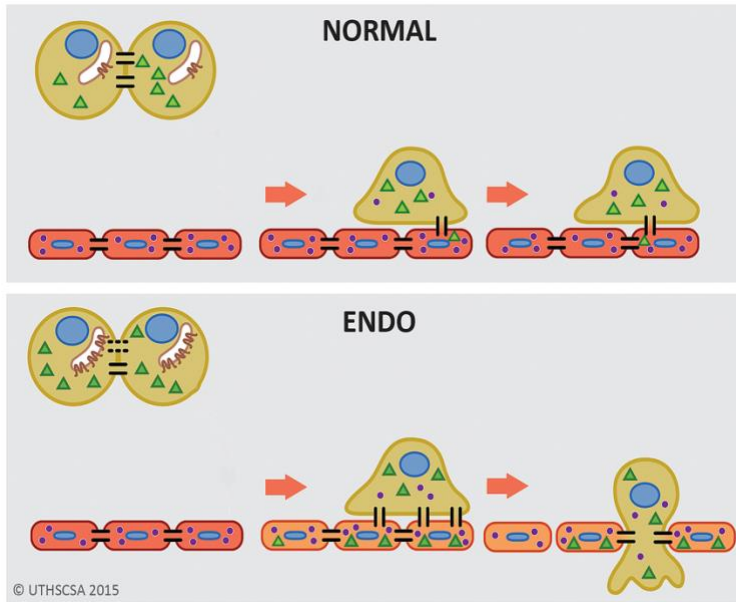

**Figure 8: Model of GJIC induction of trans-mesothelial invasion.**

**(A)** In healthy patients, when endometrial cells (brown) encounter a mesothelium (following arrival in the peritoneum via retrograde menstruation), modest GJIC provides limited exchange of signals from ESCs to PMCs (green triangles) or PMCs to ESCs (purple dots). **(B)** In endometriosis, endometrial cells have Cx43 mostly in intracellular stores, but encounters with mesothelial cells triggers Cx43 trafficking to the cell surface. The increased GJIC that results mediates transfer of signals to PMCs (green triangles), which propagate through the mesothelium, inducing disruption of the adhesive and tight junctions between PMCs, facilitating invasion of the ESCs.

631

632 **REFERENCES:**

- 633 Augoulea, A., Alexandrou, A., Creatsa, M., Vrachnis, N and Lambrinouadaki, I. Pathogenesis of  
634 endometriosis: the role of genetics, inflammation and oxidative stress, Arch. Gynecology and  
635 Obstetrics, 286: 99-103 (2012). PMID: 22546953
- 636 Beahm DL, Oshima A, Gaietta GM, Hand GM, Smock AE, Zucker SN, Toloue MM,  
637 Chandrasekhar A, Nicholson BJ, Sosinsky GE. Mutation of a conserved threonine in the third  
638 transmembrane helix of alpha- and beta-connexins creates a dominant-negative closed gap  
639 junction channel. J Biol Chem. 281: 7994-8009 (2006) PMID: 16407179
- 640 Bontempo A.C., Mikesell L., Patient perceptions of misdiagnosis of endometriosis: results from  
641 an online national survey, Diagnosis (Berl) 7: 97-106 (2020) PMID: 32007945
- 642 Burney RO, Talb S, Hamilton AE, Vo KC, Nyegaard M, Nezhat CR, et al. Gene expression of  
643 endometrioum reveals prgesteron resistance and candidate susceptibility genes in women with  
644 endometriosis. Endocrinology 148:3814-26 (2007) PMID 17510236
- 645 Burney R.O., Giudice L.C., Pathogenesis and pathophysiology of endometriosis, Fertil. Steril., 98:  
646 511-519 (2012) PMID: 22819144
- 647 Butt H.-J., and Jaschke M. Calculation of Thermal Noise in Atomic Force Microscopy.  
648 Nanotechnology 6: 1–7. (1995).
- 649 Chen Q, Boire A, Jin X, et al. Carcinoma-astrocyte gap junctions promote brain metastasis by  
650 cGAMP transfer Nature, 533 : 493-498 (2016) PMID: 27225120
- 651 Chen JC, Hoffman JR, Arora R, Perrone LA, Gonzalez-Gomez CJ, Vo KC, Laird DJ, Irwin JC,  
652 Giudice LC. Cryopreservation and recovery of human endometrial epithelial cells with high  
653 viability, purity, and functional fidelity. Fertil Steril. 105: 501-10. (2016) PMID: 26515378
- 654 Cheng Y., Ma, D. Zhang Y., Li Z., Geng L. Cervical squamous cancer mRNA profiles reveal the  
655 key genes of metastasis and invasion, Eur J Gynaecol Oncol, 36: 309-317 (2015)  
656 [PMID: 26189259
- 657 de Boer TP, van Veen TA, Bierhuizen MF, Kok B, Rook MB, Boonen KJ, Vos MA, Doevendans  
658 PA, de Bakker JM, van der Heyden MA. Connexin43 repression following epithelium-to-  
659 mesenchyme transition in embryonal carcinoma cells requires Snail1 transcription factor.  
660 Differentiation. 75:208-18. (2007) PMID: 17359298.
- 661 De La Garza EM, Binkley PA, Ganapathy M, Krishnegowda NK, Tekmal RR, Schenken RS, Kirma  
662 NB. Raf-1, a potential therapeutic target, mediates early steps in endometriosis lesion  
663 development by endometrial epithelial and stromal cells. Endocrinology. 153: 3911-21. (2012)  
664 PMID: 22619359
- 665 Diao H., Xiao S., Howerth E.W, Zhao F., Li R., Ard M.B., Ye X. Broad gap junction blocker  
666 carbenoxolone disrupts uterine preparation for embryo implantation in mice, Biol. Reproduction,  
667 89: 31. (2013) PMID: 23843229
- 668 Dufrêne YF, Ando T, Garcia R, Alsteens D, Martinez-Martin D, Engel A, Gerber C, and Müller DJ.  
669 2017. "maging Modes of Atomic Force Microscopy for Application in Molecular and Cell Biology.  
670 Nature Nanotechnology 12: 295–307.
- 671 el-Sabban M.E., Pauli B.U. Cytoplasmic dye transfer between metastatic tumor cells and vascular  
672 endothelium, J Cell Biology, 115: 1375-1382 (1991) PMID: 1955478

- 673 el-Sabban M.E., Pauli B.U. Adhesion-mediated gap junctional communication between lung-  
674 metastatic cancer cells and endothelium, *Invasion & Metastasis* 14: 164-176 (1994)  
675 PMID: 7657509
- 676 Evans W.H., Leybaert L. Mimetic peptides as blockers of connexin channel-facilitated intercellular  
677 communication, *Cell Communication & Adhesion*, 14 265-273. (2007) PMID: 18392994
- 678 Eskenazi B, Warner ML. Epidemiology of endometriosis. *Obstet Gynecol Clin North Am.* 24:235-  
679 58 (1997) PMID: 9163765
- 680 Ferreira MC, Witz CA, Hammes LS, Kirma N, Petraglia F, Schenken RS, Reis FM. Activin A  
681 increases invasiveness of endometrial cells in an in vitro model of human peritoneum. *Mol Hum*  
682 *Reprod.* 14:301-7 (2008) PMID: 18359784
- 683 Friedrichs J, Legate KR, Schubert ., Bharadwaj M, Werner C, Müller DJ and Benoit M.. A Practical  
684 Guide to Quantify Cell Adhesion Using Single-Cell Force Spectroscopy. *Methods* 60: 169–78  
685 (2013).
- 686 Grümmer R, Chwalisz K, Mulholland J, Traub O, Winterhager E. Regulation of connexin26 and  
687 connexin43 expression in rat endometrium by ovarian steroid hormones. *Biol Reprod.* 51:1109-  
688 16. (1994) PMID: 7888490
- 689 Grummer R., Reuss B., Winterhager E. Expression pattern of different gap junction connexins is  
690 related to embryo implantation, *Intl. J. Dev. Biol.* 40: 361-367. (1996) PMID: 8735949
- 691 Guo SW, Wu Y, Strawn E, Basir Z, Wang Y, Halverson G, et al. Genomic alterations in the  
692 endometrium may be a proximate cause for endometriosis. *Eur J Obstet Gynecol Reprod*  
693 *Biol.*116:89–99. (2004) PMID 15294375
- 694 Hastings J.M., Fazleabas A.T., A baboon model for endometriosis: implications for fertility, *Reprod*  
695 *Biol Endocrinol*, 4 (Suppl 1): S7 (2006). PMID: 17118171
- 696 Hong X., Sin W.C., Harris A.L, Naus., C.C. Gap junctions modulate glioma invasion by direct  
697 transfer of microRNA, *Oncotarget*, 6 :15566-15577 (2015) PMID: 25978028
- 698 Hudelist G., Fritzer N., Thomas A., Niehues C., Oppelt P., Haas D., Tammaa A., Salzer H.  
699 Diagnostic delay for endometriosis in Austria and Germany: causes and possible consequences,  
700 *Hum Reprod*, 27: 3412-3416 (2012). [PMID: 22990516]
- 701 Hugo HJ, Kokkinos MI, Blick T, Ackland ML, Thompson EW, Newgreen DF. Defining the E-  
702 cadherin repressor interactome in epithelial-mesenchymal transition: the PMC42 model as a case  
703 study. *Cells Tissues Organs.* 193:23-40 (2011) PMID: 21051859
- 704 Ito A., Katoh F., Kataoka T.R., Okada M., Tsubota N., Asada H., Yoshikawa K., Maeda S.,  
705 Kitamura Y., Yamasaki H., Nojima H. A role for heterologous gap junctions between melanoma  
706 and endothelial cells in metastasis, *J. Clin. Invest.* 105: 1189-1197 (2000) PMID: 10791993
- 707 Jahn E, Classen-Linke I, Kusche M, Beier HM, Traub O, Grümmer R, Winterhager E. Expression  
708 of gap junction connexins in the human endometrium throughout the menstrual cycle. *Hum*  
709 *Reprod.* 10: 2666-70 (1995). PMID: 8567789
- 710 Kanczuga-Koda L., Sulkowski S., Lenczewski A., Koda M., Wincewicz A., Baltaziak M.,  
711 Sulkowska M. Increased expression of connexins 26 and 43 in lymph node metastases of breast  
712 cancer, *J. Clin. Pathol.* 59: 429-433. (2006) PMID: 16567471
- 713 Kaushik T., Mishra R., Singh R.K., Bajpai S. Role of connexins in female reproductive system and  
714 endometriosis, *J Gynecol Obstet Hum Reprod*, 49:101705. (2020) PMID: 32018041

- 715 Kirk D, Irwin JC. Normal human endometrium in cell culture. *Methods Cell Biol.*21B: 51-77 (1980).  
716 PMID: 7412575
- 717 Konrad L, Dietze R, Riaz MA, Scheiner-Bobis G, Behnke J, Horné F, Hoerscher A, Reising C,  
718 Meinhold-Heerlein I. Epithelial-Mesenchymal Transition in Endometriosis-When Does It Happen?  
719 *J Clin Med.* 9:1915. (2020) PMID: 32570986
- 720 Lamiche C., Clarhaut J., Strale P.O., Crespin S., Pedretti N., Bernard F.X., Naus C.C., Chen V.C.,  
721 Foster L.J., Defamie N., Mesnil M., Debais F., Cronier L., The gap junction protein Cx43 is  
722 involved in the bone-targeted metastatic behaviour of human prostate cancer cells. *Clin. Exp.*  
723 *Metastasis*, 29: 111-122. (2012) PMID: 22080401
- 724 Laws M.J., Taylor R.N., Sidell N., DeMayo F.J., Lydon J.P., Gutstein D.E., Bagchi M.K, Bagchi  
725 I.C. Gap junction communication between uterine stromal cells plays a critical role in pregnancy-  
726 associated neovascularization and embryo survival, *Development* 135: 2659-2668 (2008)  
727 PMID: 18599509
- 728 Lucidi RS, Witz CA, Chrisco M, Binkley PA, Shain SA, Schenken RS. A novel in vitro model of  
729 the early endometriotic lesion demonstrates that attachment of endometrial cells to mesothelial  
730 cells is dependent on the source of endometrial cells. *Fertil Steril.* 84:16–21 (2005) PMID:  
731 16009148
- 732 Mettler L., Schollmeyer T., Lehmann-Willenbrock E., Schuppler U., Schmutzler A., Shukla D.,  
733 Zavala A., Lewin A. Accuracy of laparoscopic diagnosis of endometriosis, *JLS*, 7: 15-18 (2003).  
734 PMID: 12722993
- 735 Missmer SA, Hankinson SE, Spiegelman D, Barbieri RL, Michels KB, Hunter DJ. In  
736 uteroexposures and the incidence of endometriosis. *Fertil Steril.* 2004; 82:1501–8. PMID:  
737 15589850
- 738 Montgomery J, Ghatnekar GS, Grek CL, Moyer KE, Gourdie RG. Connexin 43-Based  
739 Therapeutics for Dermal Wound Healing. *Int J Mol Sci.* 19:1778. (2018) PMID: 29914066;
- 740 Mugisho O.O., Green C.R., Kho D.T., Zhang J., Graham E.S., Acosta M.L., Rupenthal I.D. The  
741 inflammasome pathway is amplified and perpetuated in an autocrine manner through connexin43  
742 hemichannel mediated ATP release, *Biochim Biophys Acta* 1862: 385-393 (2018)  
743 PMID: 29158134
- 744 Nair AS, Nair HB, Lucidi RS, Kirchner AJ, Schenken RS, Tekmal RR *et al.* Modeling the early  
745 endometriotic lesion: mesothelium-endometrial cell co-culture increases endometrial invasion and  
746 alters mesothelial and endometrial gene transcription. *Fertil. and Steril.* 90:1487-95 (2008).  
747 PMID: 18163995
- 748 Nair R.R., Jain M., Singh K. Reduced expression of gap junction gene connexin 43 in recurrent  
749 early pregnancy loss patients, *Placenta* 32: 619-621 (2011) PMID: 21669459
- 750 Naoi Y., Miyoshi Y., Taguchi T., Kim S.J., Arai T., Tamaki Y., Noguchi S. Connexin26 expression  
751 is associated with lymphatic vessel invasion and poor prognosis in human breast cancer, *Breast*  
752 *Cancer Res.Treat.* 106: 11-17 (2007) PMID: 17203385
- 753 Oosterlynck DJ, Cornillie FJ, Waer M, Vandeputte M, Koninckx PR. Women with endometriosis  
754 show a defect in natural killer activity resulting in a decreased cytotoxicity to autologous  
755 endometrium. *Fertil Steril.* 56:45–51 (1991) PMID: 2065804
- 756 Ormonde S, Chou CY, Goold L, Petsoglou C, Al-Taie R, Sherwin T, McGhee CN, Green CR.  
757 Regulation of connexin43 gap junction protein triggers vascular recovery and healing in human  
758 ocular persistent epithelial defect wounds. *J Membr Biol.* 245:381-8. (2012) PMID: 22797940.



- 759 Parente Barbosa C., Bentes De Souza A. M., Bianco B., and Christofolini D. M. The effect of  
760 hormones on endometriosis development, *Minerva Ginecol.* 63: 375–386 (2011).  
761 PMID: 21747346
- 762 Polusani SR, Huang YW, Huang G, Chen CW, Wang CM, Lin LL, Osmulski P, Lucio ND, Liu L,  
763 Hsu YT, Zhou Y, Lin CL, Aguilera-Barrantes I, Valente PT, Kost ER, Chen CL, Shim EY, Lee SE,  
764 Ruan J, Gaczynska ME, Yan P, Goodfellow PJ, Mutch DG, Jin VX, Nicholson BJ, Huang TH,  
765 Kirma NB. Adipokines Deregulate Cellular Communication via Epigenetic Repression of *Gap*  
766 *Junction* Loci in Obese Endometrial Cancer. *Cancer Res.* 79:196-208 (2019) PMID: 30389702
- 767 Regidor P.A., Regidor M., Schindler A.E., Winterhager E. Aberrant expression pattern of gap  
768 junction connexins in endometriotic tissues, *Mol. Human Reprod.* 3: 375-381 (1997)  
769 PMID: 9239721
- 770 Reymond N, d'Água BB, Ridley AJ. Crossing the endothelial barrier during metastasis. *Nat Rev*  
771 *Cancer.* 13: 858-70. (2013) PMID: 24263189
- 772 Roca-Cusachs P, Conte V, and Trepats X. Quantifying Forces in Cell Biology. *Nature Cell Biology*  
773 19: 742–51 (2017).
- 774 Rogers P.A., D'Hooghe T.M., Fazleabas A., Gargett C.E., Giudice L.C., Montgomery G.W.,  
775 Rombauts L., Salamonsen L.A., Zondervan K.T., Priorities for endometriosis research:  
776 recommendations from an international consensus workshop, *Reprod Sci*, 16: 335-346 (2009)  
777 PMID: 19196878
- 778 Ruan J, Zhang W. Identifying network communities with a high resolution. *Phys Rev E Stat Nonlin*  
779 *Soft Matter Phys.* 77: 016104 (2008). PMID: 18351912.
- 780 Ruan J. A Fully Automated Method for Discovering Community Structures in High Dimensional  
781 Data. *Proc IEEE Int Conf Data Min.* 968-973. (2009). PMID: 25296858
- 782 Sampson J.A. Peritoneal endometriosis due to menstrual dissemination of endometrial tissue into  
783 the peritoneal cavity. *Am J Obstet Gynecol.* 14: 422-469 (1927)
- 784 Sasson IE, Taylor HS. Stem cells and the pathogenesis of endometriosis. *Ann N Y Acad Sci.*  
785 1127:106–15. (2008) PMID: 18443337
- 786 Sancho A., Vandersmissen I, Craps S, Lutun A, and Groll J. A New Strategy to Measure  
787 Intercellular Adhesion Forces in Mature Cell-Cell Contacts. *Scientific Reports* 7: 46152 (2017).
- 788 Sneddon IN. “The Relation between Load and Penetration in the Axisymmetric Boussinesq  
789 Problem for a Punch of Arbitrary Profile.” *International Journal of Engineering Science* 3: 47–57  
790 (1965).
- 791 Sokolov, I, and Dokukin M. Mechanics of Biological Cells Studied with Atomic Force Microscopy.  
792 *Microscopy and Microanalysis* 20: 2076–77 (2014).
- 793 Soliman A.M., Yang H., Du E.X., Kelley C., Winkel C. The direct and indirect costs associated  
794 with endometriosis: a systematic literature review, *Hum Reprod*, 31: 712-722 (2016)  
795 PMID: 26851604
- 796 Somigliana E, Vignani P, Gaffuri B, Guarneri D, Busacca M, Vignani M. Human  
797 endometrial stromal cells as a source of soluble intercellular adhesion molecule (ICAM)-1  
798 molecules. *Hum Reprod.* 11:1190–4 (1996) PMID 8671421
- 799 Stoletov K., Strnadel J., Zardoujian E., Momiyama M., Park F.D., Kelber J.A., Pizzo D.P.,  
800 Hoffman R., VandenBerg S.R., Klemke R.L. Role of connexins in metastatic breast cancer and  
801 melanoma brain colonization, *J Cell Sci.* 126: 904-913. (2013) PMID: 23321642

- 802 Tamaresis J.S., Irwin J.C., Goldfien G.A., Rabban J.T., Burney R.O., Nezhat C., DePaolo L.V.,  
803 Giudice L.C., Molecular classification of endometriosis and disease stage using high-dimensional  
804 genomic data, *Endocrinology*, 155: 4986-4999 (2014) PMID: 25243856
- 805 Taubenberger AV., Hutmacher DW, and Muller DJ. Single-Cell Force Spectroscopy, an Emerging  
806 Tool to Quantify Cell Adhesion to Biomaterials. *Tissue Engineering Part B: Reviews* 20: 40–55  
807 (2014)
- 808 Ulukus M., Cakmak H., Arici A. The role of endometrium in endometriosis, *J Soc Gynecol Investig*,  
809 13: 467-476 (2006) PMID: 16990031
- 810 Weber PA, Chang HC, Spaeth KE, Nitsche JM, Nicholson BJ. The permeability of gap junction  
811 channels to probes of different size is dependent on connexin composition and permeant-pore  
812 affinities. *Biophys J* 87:958-973. (2004) PMID 15298902
- 813 Willebrords J, Crespo Yanguas S, Maes M, Decrock E, Wang N, Leybaert L, Kwak BR, Green  
814 CR, Cogliati B, Vinken M. Connexins and their channels in inflammation. *Crit Rev Biochem Mol*  
815 *Biol.* 51:413-439 (2016). PMID: 27387655
- 816 Winterhager E, Grümmer R, Mavrogianis PA, Jones CJ, Hastings JM, Fazleabas AT. Connexin  
817 expression pattern in the endometrium of baboons is influenced by hormonal changes and the  
818 presence of endometriotic lesions. *Mol Hum Reprod.* 15:645-52. (2009) PMID: 19661121
- 819 Winterhager E., Kidder G.M. Gap junction connexins in female reproductive organs: implications  
820 for women's reproductive health, *Hum Reprod Update*, 21: 340-352. (2015) PMID: 25667189
- 821 Yu J., Boicea A., Barrett K.L., James C.O., Bagchi I.C., Bagchi M.K, Nezhat C., Sidell N., Taylor  
822 R.N., Reduced connexin 43 in eutopic endometrium and cultured endometrial stromal cells from  
823 subjects with endometriosis, *Mol. Human Reprod.* 20: 260-270 (2014) PMID: 24270393
- 824 Zhang A., Hitomi M., Bar-Shain N., Dalimov Z., Ellis L., Velpula K.K., Fraizer G.C., Gourdie R.G.,  
825 Lathia J.D. Connexin 43 expression is associated with increased malignancy in prostate cancer  
826 cell lines and functions to promote migration, *Oncotarget*, 6: 11640-11651 (2015)  
827 PMID: 25960544

## **Endometrial Gap Junction Expression - Early Indicators of Endometriosis and Integral to Invasiveness**

Chen-Wei Chen <sup>#,1</sup>, Jeffery Chavez <sup>#,1</sup>, Li-Ling Lin<sup>2</sup>, Chiou-Miin Wang<sup>2</sup>, Ya-Ting Hsu<sup>2</sup>, Matthew J. Hart<sup>1</sup>, Jianhua Ruan<sup>3</sup>, Laurie Gillette <sup>4</sup>, Richard O. Burney<sup>4</sup>, Robert S. Schenken<sup>5</sup>, Randal D. Robinson<sup>5</sup>, Maria Gaczynska<sup>2</sup>, Pawel Osmulski<sup>2</sup>, Nameer B. Kirma<sup>2\*</sup>, Bruce J. Nicholson<sup>1\*</sup>

**SUPPLEMENTARY MATERIAL**

**TABLE S1:** Genes in gene panel microarray

| Group                | Gene   | Protein           | Group          | Gene           | Protein                         |
|----------------------|--------|-------------------|----------------|----------------|---------------------------------|
| <b>GJs</b>           | GJA1   | Cx43              | <b>Kinases</b> | MAPK1          | ERK1                            |
|                      | GJA3   | Cx46              |                | MAPK3          | ERK3                            |
|                      | GJA5   | Cx40              |                | PRKACA         | Prot. Kin.A $\alpha$ (cat. su)  |
|                      | GJA8   | Cx50              |                | PRKACB         | Prot. Kin.A $\beta$ (cat. su)   |
|                      | GJA9   | Cx59              |                | PRKACG         | Prot. Kin. A $\gamma$ (cat. su) |
|                      | GJB1   | Cx32              |                | PRKCA          | Prot. Kinase C $\alpha$         |
|                      | GJB2   | Cx26              |                | PRKCB          | Prot.Kinase C $\beta$           |
|                      | GJB3   | Cx31              |                | CDK1           | Cyclin Dep.kinase1              |
|                      | GJB4   | Cx30.3            |                | CSNK 1D        | Casein Kinase 1 $\Delta$        |
|                      | GJB5   | Cx31.1            |                | SRC            | c-src                           |
|                      | GJB6   | Cx30              |                | NOV            | CCN3                            |
|                      | GJB7   | Cx25              |                | PLCB1          | Phosholipase B1                 |
|                      | GJC2   | Cx47              |                | <b>Markers</b> | VIM                             |
| <b>Adhesion/TJs.</b> | TJAP1  | TJ assoc. protein | MME/CD10       |                | Metallo-endopept.               |
|                      | TJP1   | ZO1               | EPCAM          |                | Ep CAM                          |
|                      | TJP2   | ZO2               | KRT 18         |                | Cytokeratin 18                  |
|                      | CAV1   | caveolin          |                |                |                                 |
|                      | CDH2   | N-cadherin        |                |                |                                 |
|                      | SNAIL1 | Snail 1           |                |                |                                 |
|                      | CTNNB1 | beta-catenin      | <b>Stand.</b>  | GAPDH          | GAP dehydrog.                   |
|                      | DBN1   | Drebin 1          |                | ACTIN-B        | Actin                           |

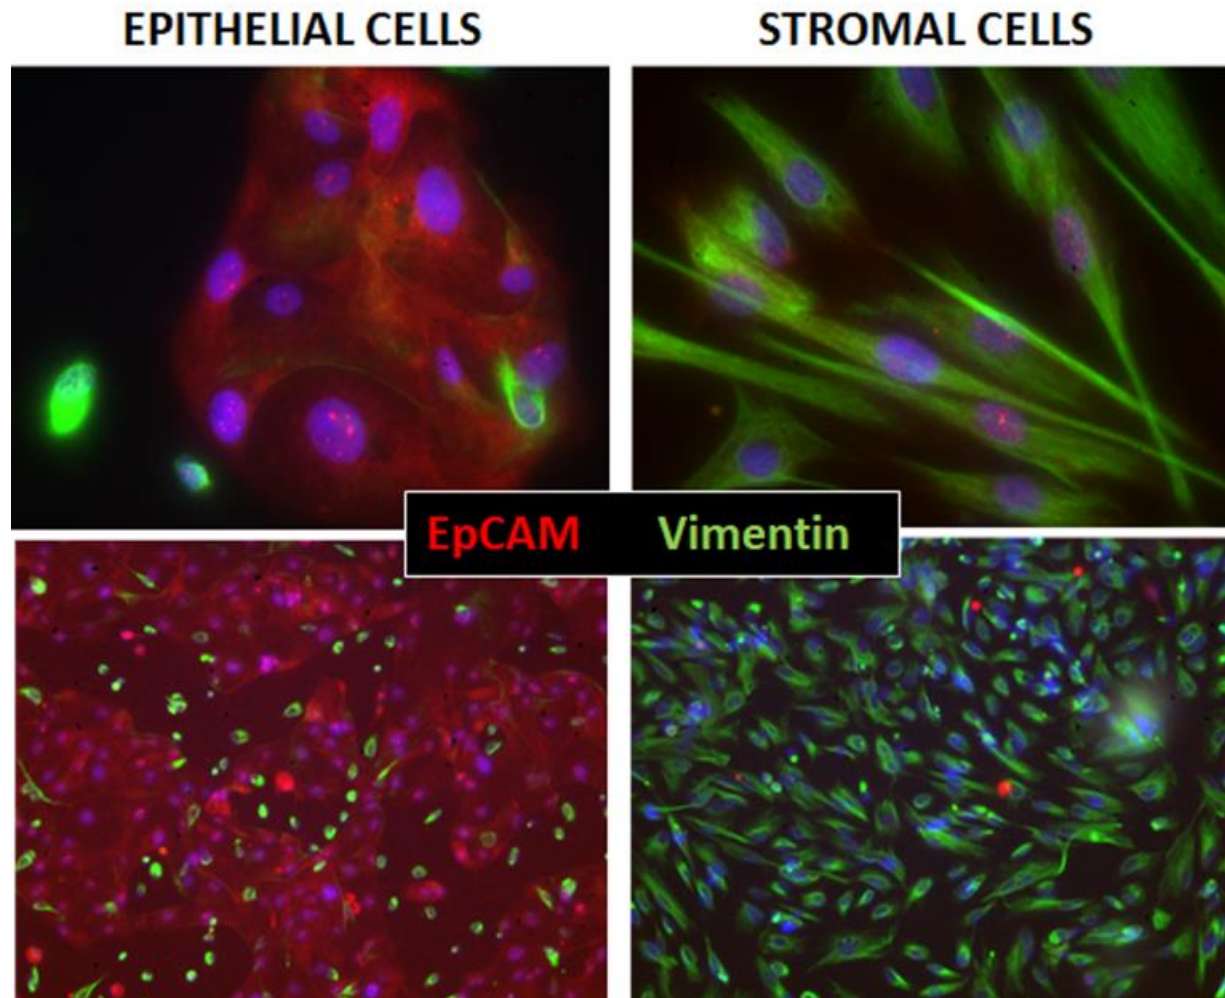

**Figure S1: Immunocytochemical assessment of Epithelial and Stromal cell isolations from two patients.**

Endometrial cells are separated by differential sedimentation and adhesion into epithelial (left) and stromal populations (right). Immunohistochemistry [40x (top) and 10x (bottom)] demonstrate the purity of the isolations by dual staining with EpCAM antibodies to mark epithelial cells (red), and Vimentin antibodies to mark stromal cells (green). Nuclei are stained blue with DAPI in both.

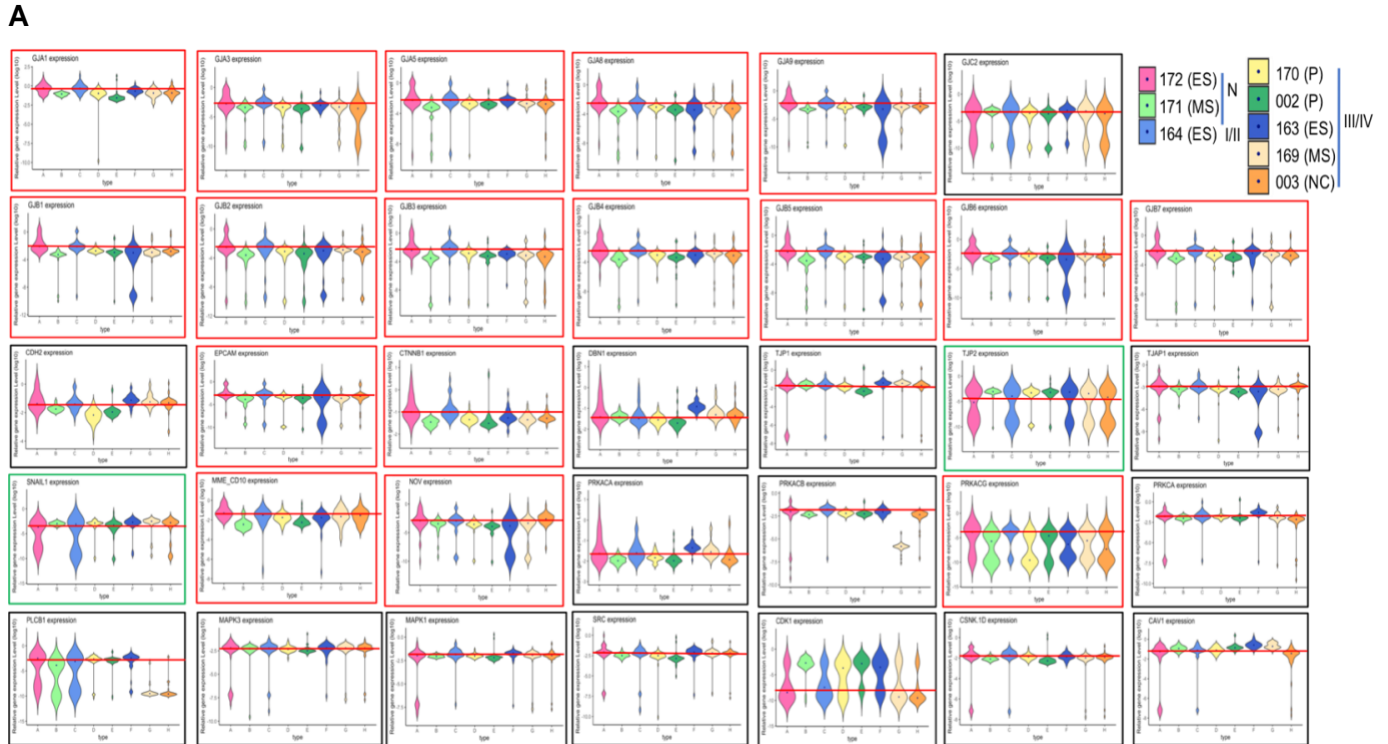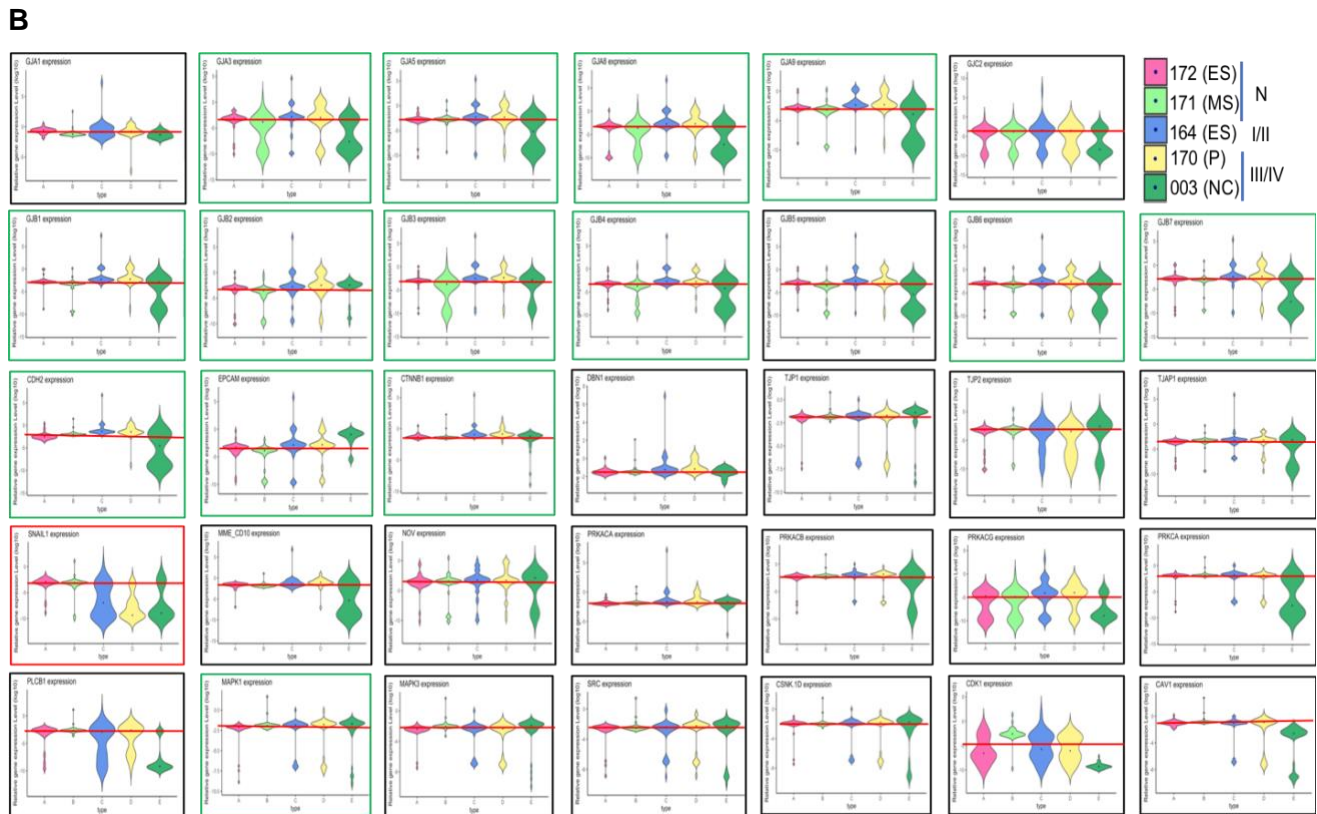

**Figure S2: Violin plots of average cell expression levels for all genes for which signals were detected and for all patients in stromal(A) and Epithelial cells (B).**

Patients are color coded in legend, and are arranged in each plot from left to right as control (N), early stage (I/II) and late stage endometriosis. Phase of the cell cycle when samples were collected are indicated in the legend (P = proliferative; ES = early secretory; MS = mid-secretory; NC = non-cycling). The average value of control and early stage endometriosis in ESCs (**A**) or just control samples in EECs (**B**) is shown as a red horizontal line for reference, and the general pattern with endometriosis is indicated by arrows, and color of margin (red = decreased expression with endometriosis, green = increased expression). Note that in ESC samples collected at the MS stage and EECs (and in a few cases ESCs) collected from non-cycling patients, some genes show a divergence from general pattern of gene expression, indicating effects of the hormonal environment on expression.
